# Supplementary material for: DiTing: A Pipeline to Infer and Compare Biogeochemical Pathways From Metagenomic and Metatranscriptomic Data
Source: Front Microbiol. 2021 Aug 2;12:698286. doi: 10.3389/fmicb.2021.698286 (PMC8367434; doi:10.3389/fmicb.2021.698286)
Supplement: Supplementary file 2 [file Table_2.XLSX]

## Sheet: Sheet1
Table S2 The functional comparison of the simulated data produced by DiTing with the real result
	DiTing result					Real result
	Cya:SAR11:AOA
k_number	1:0:0	0:1:0	0:0:1	1:1:1	1:2:3	1:0:0	0:1:0	0:0:1	1:1:1	1:2:3
K00003	148.866	663.284	434.362	289.216	368.077	161.067	697.447	448.994	303.964	316.693
K00010	0	141.062	0	17.9784	23.3215	0	139.489	0	20.2642	21.1129
K00012	174.81	534.247	0	189.617	174.844	193.28	557.958	0	202.642	147.79
K00013	179.933	389.801	0	186.991	173.356	193.28	697.447	0	222.907	168.903
K00014	159.686	658.445	436.877	293.676	368.597	161.067	697.447	448.994	303.964	316.693
K00016	94.6479	0	0	65.3327	42.4532	96.6401	0	0	60.7927	31.6693
K00019	30.052	0	0	18.2275	12.6525	32.2134	0	0	20.2642	10.5564
K00020	34.1302	520.211	0	97.4325	111.903	32.2134	557.958	0	101.321	95.0079
K00024	125.988	663.055	436.477	251.577	351.201	128.854	697.447	448.994	283.699	306.136
K00027	152.462	0	0	95.0081	60.1809	161.067	0	0	101.321	52.7821
K00029	0	132.915	0	21.8682	26.674	0	139.489	0	20.2642	21.1129
K00031	122.113	684.836	0	184.365	180.192	128.854	697.447	0	182.378	147.79
K00033	241.379	0	0	158.02	101.086	257.707	0	0	162.114	84.4514
K00034	149.198	0	0	99.7935	60.6246	161.067	0	0	101.321	52.7821
K00036	237.359	0	0	155.218	100.538	257.707	0	0	162.114	84.4514
K00045	0	132.847	0	20.2569	25.5164	0	139.489	0	20.2642	21.1129
K00052	157.008	654.185	0	191.143	185.234	161.067	697.447	0	202.642	158.346
K00053	153.285	675.671	505.278	322.232	367.468	161.067	697.447	448.994	303.964	316.693
K00054	0	0	428.608	94.7192	179.161	0	0	448.994	101.321	158.346
K00057	146.875	129.341	0	112.644	84.3772	161.067	139.489	0	121.585	73.895
K00058	152.172	404.613	613.015	297.116	402.616	161.067	418.468	628.592	303.964	337.806
K00059	668.688	529.807	865.492	674.416	783.406	708.694	836.937	897.989	770.041	675.611
K00066	30.289	0	0	18.8405	11.5529	32.2134	0	0	20.2642	10.5564
K00067	305.744	127.526	604.757	355.934	406.228	322.134	139.489	628.592	364.756	348.362
K00074	30.9795	0	89.8724	38.4012	49.9749	32.2134	0	179.598	60.7927	73.895
K00075	149.238	609.052	0	195.252	186.585	161.067	697.447	0	202.642	158.346
K00076	27.4726	0	0	16.461	9.98178	32.2134	0	0	20.2642	10.5564
K00077	62.899	127.26	0	61.7696	52.9748	64.4268	139.489	0	60.7927	42.2257
K00088	0	665.759	436.882	191.886	306.757	0	697.447	448.994	202.642	263.911
K00091	93.7669	0	0	59.098	38.8055	96.6401	0	0	60.7927	31.6693
K00096	0	136.494	435.406	111.21	209.42	0	139.489	448.994	121.585	179.459
K00097	91.048	0	0	56.4963	35.63	96.6401	0	0	60.7927	31.6693
K00099	157.254	524.645	0	175.341	165.581	161.067	557.958	0	182.378	137.234
K00101	31.9069	0	0	20.612	13.6662	32.2134	0	0	20.2642	10.5564
K00102	0	130.647	0	19.4045	25.1784	0	139.489	0	20.2642	21.1129
K00104	153.252	387.521	0	156.157	137.013	161.067	418.468	0	162.114	116.121
K00108	127.687	517.818	0	176.24	178.499	128.854	697.447	0	182.378	147.79
K00111	92.1005	137.395	0	76.4042	61.1365	96.6401	139.489	0	81.057	52.7821
K00113	0	377.137	0	61.0644	74.9767	0	418.468	0	60.7927	63.3386
K00118	55.4316	0	0	36.2222	21.8082	64.4268	0	0	40.5285	21.1129
K00121	156.09	0	0	98.4225	61.2447	161.067	0	0	101.321	52.7821
K00122	0	130.444	0	22.3408	27.6504	0	139.489	0	20.2642	21.1129
K00123	0	397.211	0	63.3561	102.401	0	557.958	0	81.057	84.4514
K00128	29.9169	0	0	19.4105	12.7002	32.2134	0	0	20.2642	10.5564
K00133	153.304	692.414	437.236	293.285	368.65	161.067	697.447	448.994	303.964	316.693
K00134	272.154	659.769	0	276.893	243.022	289.92	697.447	0	283.699	200.572
K00135	92.6299	406.208	88.5201	190.389	198.564	96.6401	697.447	179.598	202.642	200.572
K00137	0	133.079	0	18.3132	23.6673	0	139.489	0	20.2642	21.1129
K00138	0	385.743	0	59.5936	75.958	0	418.468	0	60.7927	63.3386
K00140	0	662.149	0	107.341	122.969	0	697.447	0	101.321	105.564
K00145	189.695	659.075	436.371	313.263	364.983	193.28	697.447	448.994	324.228	327.249
K00146	29.9169	0	0	19.4105	12.7002	32.2134	0	0	20.2642	10.5564
K00147	148.592	0	0	99.6833	65.1675	161.067	0	0	101.321	52.7821
K00150	117.606	0	260.33	152.9	198.982	128.854	0	359.195	162.114	168.903
K00158	29.9409	0	0	18.7512	13.277	32.2134	0	0	20.2642	10.5564
K00161	150.112	0	0	96.3138	61.73	161.067	0	0	101.321	52.7821
K00162	151.517	129.92	0	115.852	85.8465	161.067	139.489	0	121.585	73.895
K00163	0	661.038	0	96.0789	123.8	0	697.447	0	101.321	105.564
K00164	0	668.487	0	98.4013	124.615	0	697.447	0	101.321	105.564
K00174	0	0	441.371	98.1698	187.133	0	0	448.994	101.321	158.346
K00175	0	0	427.21	99.6055	189.531	0	0	448.994	101.321	158.346
K00206	0	130.477	0	19.1016	24.5442	0	139.489	0	20.2642	21.1129
K00208	151.891	782.126	0	215.219	209.368	161.067	836.937	0	222.907	179.459
K00214	118.607	0	0	73.7113	46.2355	128.854	0	0	81.057	42.2257
K00215	158.576	663.816	0	198.151	189.86	161.067	697.447	0	202.642	158.346
K00218	158.857	0	0	92.9096	59.6415	161.067	0	0	101.321	52.7821
K00220	0	131.422	0	15.64	22.1447	0	139.489	0	20.2642	21.1129
K00226	83.2914	0	0	58.0882	37.9957	96.6401	0	0	60.7927	31.6693
K00227	32.2923	0	0	18.9818	12.5684	32.2134	0	0	20.2642	10.5564
K00228	182.366	650.977	0	206.847	194.745	193.28	697.447	0	222.907	168.903
K00230	0	129.728	0	18.3068	23.6603	0	139.489	0	20.2642	21.1129
K00231	30.884	0	0	19.2287	11.9374	32.2134	0	0	20.2642	10.5564
K00239	124.049	523.353	435.586	276.879	363.93	128.854	697.447	448.994	283.699	306.136
K00240	124.344	655.309	431.32	270.438	356.616	128.854	697.447	448.994	283.699	306.136
K00241	0	124.006	255.505	80.14	139.144	0	139.489	269.397	81.057	116.121
K00242	0	141.211	0	19.7098	24.7951	0	139.489	0	20.2642	21.1129
K00245	0	0	431.32	80.097	152.22	0	0	448.994	101.321	158.346
K00249	30.962	0	0	19.6007	12.3527	32.2134	0	0	20.2642	10.5564
K00254	149.819	669.389	0	187.45	175.612	161.067	697.447	0	202.642	158.346
K00259	148.817	536.136	0	178.513	165.702	161.067	557.958	0	182.378	137.234
K00263	63.1782	0	0	39.6602	25.299	64.4268	0	0	40.5285	21.1129
K00265	247.019	268.183	0	196.883	152.242	257.707	278.979	0	202.642	126.677
K00266	90.0221	387.828	0	159.842	166.822	96.6401	697.447	0	162.114	137.234
K00274	57.859	0	0	37.7706	23.2443	64.4268	0	0	40.5285	21.1129
K00275	278.626	1167.2	0	335.848	322.561	289.92	1255.4	0	364.756	285.024
K00276	30.1433	0	0	19.6737	11.8516	32.2134	0	0	20.2642	10.5564
K00278	157.773	133.79	0	119.071	87.801	161.067	139.489	0	121.585	73.895
K00279	30.2728	0	0	20.0547	13.4907	32.2134	0	0	20.2642	10.5564
K00281	150.977	515.699	0	178.981	154.578	161.067	557.958	0	182.378	137.234
K00284	215.58	0	0	137.872	89.5448	225.494	0	0	141.85	73.895
K00285	0	673.393	0	100.743	125.255	0	697.447	0	101.321	105.564
K00286	179.364	0	0	112.018	76.2538	193.28	0	0	121.585	63.3386
K00290	0	128.992	0	18.7315	23.5055	0	139.489	0	20.2642	21.1129
K00297	145.187	0	0	98.5111	62.3272	161.067	0	0	101.321	52.7821
K00299	115.901	0	0	74.6152	44.9023	128.854	0	0	81.057	42.2257
K00302	0	535.106	0	76.7007	96.7467	0	557.958	0	81.057	84.4514
K00303	0	1313.6	0	195.913	250.537	0	1394.89	0	202.642	211.129
K00304	0	994.866	0	159.842	203.83	0	976.426	0	141.85	147.79
K00305	0	133.372	0	18.0887	25.289	0	139.489	0	20.2642	21.1129
K00309	0	133.359	0	19.8326	25.6696	0	139.489	0	20.2642	21.1129
K00311	0	532.651	0	81.849	103.742	0	557.958	0	81.057	84.4514
K00313	0	0	85.3932	20.9345	39.4487	0	0	89.7989	20.2642	31.6693
K00314	0	132.205	0	20.2712	25.666	0	139.489	0	20.2642	21.1129
K00315	0	809.164	0	117.948	150.291	0	836.937	0	121.585	126.677
K00318	125.084	0	0	80.6711	53.6977	128.854	0	0	81.057	42.2257
K00320	0	0	447.043	95.0799	175.034	0	0	448.994	101.321	158.346
K00324	182.161	655.359	0	226.076	205.414	193.28	697.447	0	222.907	168.903
K00325	176.695	664.364	0	212.591	195.022	193.28	697.447	0	222.907	168.903
K00330	148.877	652.882	0	205.307	194.709	161.067	697.447	0	202.642	158.346
K00331	0	657.741	0	98.9283	124.751	0	697.447	0	101.321	105.564
K00333	144.817	667.557	0	191.908	181.806	161.067	697.447	0	202.642	158.346
K00334	0	645.299	0	91.6412	118.5	0	697.447	0	101.321	105.564
K00335	93.5458	392.573	0	114.191	105.772	96.6401	418.468	0	121.585	95.0079
K00337	157.52	650.316	0	194.918	184.434	161.067	697.447	0	202.642	158.346
K00338	29.5596	648.506	0	110.111	135.634	32.2134	697.447	0	121.585	116.121
K00339	151.231	651.648	0	197.024	190.628	161.067	697.447	0	202.642	158.346
K00340	147.823	661.96	409.189	282.2	361.019	161.067	697.447	448.994	303.964	316.693
K00341	181.997	665.207	437.493	306.36	377.277	193.28	697.447	448.994	324.228	327.249
K00342	215.009	651.27	0	231.89	209.061	225.494	697.447	0	243.171	179.459
K00343	152.922	532.391	414.083	295.054	376.109	161.067	697.447	448.994	303.964	316.693
K00344	278.262	663.868	344.398	349.631	391.482	289.92	697.447	359.195	364.756	327.249
K00355	0	386.841	0	55.8402	68.0364	0	418.468	0	60.7927	63.3386
K00362	30.8318	0	0	21.0266	14.3528	32.2134	0	0	20.2642	10.5564
K00363	30.1187	0	0	19.6704	12.1789	32.2134	0	0	20.2642	10.5564
K00366	181.664	0	0	120.646	76.3519	193.28	0	0	121.585	63.3386
K00367	154.74	0	0	99.3619	63.1954	161.067	0	0	101.321	52.7821
K00368	0	0	726.301	154.994	389.469	0	0	1257.18	283.699	443.37
K00381	159.293	0	0	100.925	66.3763	161.067	0	0	101.321	52.7821
K00382	149.95	663.756	0	195.173	189.127	161.067	697.447	0	202.642	158.346
K00383	180.857	138.538	0	134.802	100.588	193.28	139.489	0	141.85	84.4514
K00384	210.173	645.611	441.662	331.443	398.595	225.494	697.447	448.994	344.492	337.806
K00389	194.728	0	0	112.269	69.103	193.28	0	0	121.585	63.3386
K00390	226.524	0	414.959	243.893	270.868	225.494	0	448.994	243.171	232.241
K00392	159.293	0	0	100.925	66.3763	161.067	0	0	101.321	52.7821
K00394	0	455.225	0	62.686	78.3811	0	418.468	0	60.7927	63.3386
K00395	30.9126	515.801	0	82.808	92.1547	32.2134	418.468	0	81.057	73.895
K00411	0	663	0	101.982	130.399	0	697.447	0	101.321	105.564
K00412	0	679.965	0	95.0211	122.867	0	697.447	0	101.321	105.564
K00413	0	664.045	0	105.617	131.073	0	697.447	0	101.321	105.564
K00425	123.808	0	0	76.0861	48.5517	128.854	0	0	81.057	42.2257
K00426	118.273	0	0	82.278	50.0004	128.854	0	0	81.057	42.2257
K00428	93.351	0	0	59.0758	37.0523	96.6401	0	0	60.7927	31.6693
K00432	32.1336	677.383	0	113.013	134.449	32.2134	697.447	0	121.585	116.121
K00436	92.1245	0	0	54.7131	36.1102	96.6401	0	0	60.7927	31.6693
K00441	0	133.377	0	16.5833	21.9192	0	139.489	0	20.2642	21.1129
K00449	30.858	0	0	21.8754	14.071	32.2134	0	0	20.2642	10.5564
K00453	29.603	0	0	19.2276	12.5328	32.2134	0	0	20.2642	10.5564
K00456	34.4713	0	0	22.608	13.1672	32.2134	0	0	20.2642	10.5564
K00457	156.449	0	0	96.1034	60.9785	161.067	0	0	101.321	52.7821
K00459	62.0684	0	0	40.5075	26.3764	64.4268	0	0	40.5285	21.1129
K00464	397.022	0	0	252.007	159.588	418.774	0	0	263.435	137.234
K00469	29.179	0	0	18.4659	11.0825	32.2134	0	0	20.2642	10.5564
K00479	0	128.808	0	16.0537	21.8092	0	139.489	0	20.2642	21.1129
K00485	58.8107	0	0	36.4055	23.5959	64.4268	0	0	40.5285	21.1129
K00486	93.8031	0	0	60.1279	38.2995	96.6401	0	0	60.7927	31.6693
K00499	0	532.426	0	77.5792	100.319	0	557.958	0	81.057	84.4514
K00505	63.2501	0	258.724	101.231	142.775	64.4268	0	269.397	101.321	116.121
K00507	349.056	0	0	216.454	133.417	354.347	0	0	222.907	116.121
K00508	58.4672	0	0	38.8106	24.9309	64.4268	0	0	40.5285	21.1129
K00514	149.071	0	0	89.6405	58.2734	161.067	0	0	101.321	52.7821
K00518	59.1528	0	0	33.5231	21.4883	64.4268	0	0	40.5285	21.1129
K00524	93.2895	0	0	60.8948	40.2492	96.6401	0	0	60.7927	31.6693
K00525	93.5737	631.917	652.973	270.583	405.07	96.6401	697.447	448.994	263.435	295.58
K00526	63.9766	669.391	0	157.345	152.139	64.4268	697.447	0	141.85	126.677
K00537	54.8636	0	0	36.5714	21.7641	64.4268	0	0	40.5285	21.1129
K00544	0	665.888	0	99.557	126.802	0	697.447	0	101.321	105.564
K00548	216.278	0	947.92	340.491	467.018	225.494	0	897.989	344.492	390.588
K00549	61.3453	134.07	0	59.7435	50.6585	64.4268	139.489	0	60.7927	42.2257
K00554	150.791	649.411	0	197.498	183.747	161.067	697.447	0	202.642	158.346
K00555	97.2732	0	253.658	120.349	145.872	96.6401	0	269.397	121.585	126.677
K00556	32.3621	0	0	20.1064	13.0184	32.2134	0	0	20.2642	10.5564
K00558	832.388	131.158	352.304	637.473	525.791	901.975	139.489	359.195	668.72	443.37
K00560	60.1867	0	0	38.9634	24.6173	64.4268	0	0	40.5285	21.1129
K00566	154.787	654.575	0	198.925	191.234	161.067	697.447	0	202.642	158.346
K00567	32.1376	0	0	21.0384	13.75	32.2134	0	0	20.2642	10.5564
K00568	0	515.022	0	69.1906	88.203	0	557.958	0	81.057	84.4514
K00571	417.078	644.916	438.684	471.07	485.151	450.987	697.447	448.994	486.342	411.701
K00573	64.4783	0	262.319	99.9218	129.754	64.4268	0	269.397	101.321	116.121
K00574	62.6645	1204.47	0	211.096	246.691	64.4268	1255.4	0	222.907	211.129
K00575	302.495	0	172.295	232.57	199.574	322.134	0	179.598	243.171	168.903
K00577	0	0	438.476	95.2171	179.853	0	0	448.994	101.321	158.346
K00588	244.172	514.308	429.205	346.36	406.85	257.707	557.958	448.994	344.492	327.249
K00595	188.117	0	0	113.627	69.1209	193.28	0	0	121.585	63.3386
K00598	117.673	0	0	69.6725	46.6915	128.854	0	0	81.057	42.2257
K00600	148.098	653.658	436.916	284.025	377.295	161.067	697.447	448.994	303.964	316.693
K00602	149.418	669.376	0	207.623	188.438	161.067	697.447	0	202.642	158.346
K00604	149.145	672.286	0	202.58	190.725	161.067	697.447	0	202.642	158.346
K00605	186.493	1069.02	0	274.675	267.694	193.28	1115.92	0	283.699	232.241
K00606	155.644	795.046	432.905	300.713	382.064	161.067	836.937	448.994	324.228	337.806
K00609	154.133	631.46	351.226	298.019	360.665	161.067	697.447	448.994	303.964	316.693
K00610	0	0	419.591	102.738	186.477	0	0	448.994	101.321	158.346
K00611	145.62	131.332	348.942	186.567	229.118	161.067	139.489	359.195	202.642	200.572
K00612	0	809.17	0	122.784	152.182	0	836.937	0	121.585	126.677
K00613	27.1099	401.023	0	80.3644	90.0532	32.2134	418.468	0	81.057	73.895
K00615	304.89	930.359	443.079	456.767	529.341	322.134	976.426	538.793	466.078	443.37
K00616	271.464	256.288	425.309	316.133	346.215	289.92	278.979	448.994	324.228	295.58
K00620	188.969	525.589	0	192.902	174.409	193.28	557.958	0	202.642	147.79
K00621	0	0	434.319	102	176.963	0	0	448.994	101.321	158.346
K00626	58.5604	661.094	0	128.127	141.827	64.4268	697.447	0	141.85	126.677
K00632	29.5046	0	0	18.7279	11.1028	32.2134	0	0	20.2642	10.5564
K00638	25.5038	0	0	20.4309	12.2808	32.2134	0	0	20.2642	10.5564
K00640	326.946	509.792	0	288.785	231.4	354.347	557.958	0	303.964	200.572
K00641	123.142	785.617	0	199.942	214.744	128.854	836.937	0	202.642	168.903
K00643	0	269.849	0	38.7179	49.4711	0	278.979	0	40.5285	42.2257
K00645	484.911	530.497	0	383.01	278.313	515.414	557.958	0	405.285	253.354
K00647	0	546.363	0	75.9024	99.4639	0	557.958	0	81.057	84.4514
K00648	220.36	0	0	137.078	86.3115	225.494	0	0	141.85	73.895
K00652	182.968	0	0	118.071	74.7542	193.28	0	0	121.585	63.3386
K00655	232.206	397.806	0	199.193	168.587	257.707	418.468	0	222.907	147.79
K00656	118.274	0	0	76.62	49.3229	128.854	0	0	81.057	42.2257
K00657	213.063	0	0	132.719	83.9389	225.494	0	0	141.85	73.895
K00658	0	666.679	0	94.7062	117.657	0	697.447	0	101.321	105.564
K00661	244.911	0	0	161.284	104.85	257.707	0	0	162.114	84.4514
K00662	150.014	0	0	83.1377	61.132	128.854	0	0	81.057	42.2257
K00663	59.816	0	0	42.1177	25.7963	64.4268	0	0	40.5285	21.1129
K00666	0	135.154	0	18.7211	23.7146	0	139.489	0	20.2642	21.1129
K00674	0	655.544	0	102.125	125.927	0	697.447	0	101.321	105.564
K00677	144.459	647.114	0	189.433	176.877	161.067	697.447	0	202.642	158.346
K00681	152.296	0	0	97.7176	65.1479	161.067	0	0	101.321	52.7821
K00682	146.661	388.133	0	151.132	132.497	161.067	278.979	0	141.85	95.0079
K00684	147.648	0	0	92.3401	58.6882	161.067	0	0	101.321	52.7821
K00688	244.961	0	0	152.445	99.2521	257.707	0	0	162.114	84.4514
K00690	32.9373	134.752	0	41.0555	39.3993	32.2134	139.489	0	40.5285	31.6693
K00694	245.002	0	0	153.534	94.0671	257.707	0	0	162.114	84.4514
K00695	184.41	0	0	119.422	75.1945	193.28	0	0	121.585	63.3386
K00696	60.5337	0	0	39.1326	24.4878	64.4268	0	0	40.5285	21.1129
K00700	251.737	0	0	163.963	117.321	257.707	0	0	162.114	84.4514
K00701	88.6079	0	0	55.5541	34.4753	96.6401	0	0	60.7927	31.6693
K00703	249.166	0	0	160.328	99.5595	257.707	0	0	162.114	84.4514
K00705	247.992	0	0	156.382	101.725	257.707	0	0	162.114	84.4514
K00720	185.642	0	0	115.517	76.7424	193.28	0	0	121.585	63.3386
K00721	270.939	138.219	686.011	355.117	435.148	289.92	139.489	718.391	364.756	369.475
K00728	93.9523	0	0	58.8083	36.5188	96.6401	0	0	60.7927	31.6693
K00729	0	131.859	0	19.9309	23.5997	0	139.489	0	20.2642	21.1129
K00737	0	399.387	0	63.3076	77.7863	0	418.468	0	60.7927	63.3386
K00748	151.323	657.898	0	192.672	181.576	161.067	697.447	0	202.642	158.346
K00754	29.905	0	0	17.4734	11.0655	32.2134	0	0	20.2642	10.5564
K00757	86.823	0	0	61.2484	39.3063	96.6401	0	0	60.7927	31.6693
K00759	150.963	635.562	421.486	292.815	374.308	161.067	697.447	448.994	303.964	316.693
K00761	159.925	0	0	101.283	63.5911	161.067	0	0	101.321	52.7821
K00762	245.869	641.28	415.635	356.575	417.422	257.707	697.447	448.994	364.756	348.362
K00763	148.389	131.264	0	111.842	84.4492	161.067	139.489	0	121.585	73.895
K00764	146.518	662.9	494.756	292.292	374.524	161.067	697.447	448.994	303.964	316.693
K00765	149.487	666.177	440.258	294.988	367.37	161.067	697.447	448.994	303.964	316.693
K00766	355.323	650.756	426.956	414.229	448.795	386.561	697.447	448.994	445.813	390.588
K00767	156.366	543.437	428.645	277.999	348.993	161.067	557.958	448.994	283.699	295.58
K00769	0	128.261	0	19.8989	25.8441	0	139.489	0	20.2642	21.1129
K00772	149.253	0	340.401	188.778	249.023	161.067	0	448.994	202.642	211.129
K00773	153.631	527.405	0	171.64	159.482	161.067	557.958	0	182.378	137.234
K00783	0	137.561	0	15.8432	22.1966	0	139.489	0	20.2642	21.1129
K00784	296.664	0	444.956	294.501	311.486	322.134	0	448.994	303.964	263.911
K00788	148.394	377.455	0	156.729	137.839	161.067	418.468	0	162.114	116.121
K00789	152.744	704.598	515.019	311.387	411.893	161.067	697.447	538.793	324.228	348.362
K00790	159.856	771.51	0	193.88	184.812	161.067	697.447	0	202.642	158.346
K00791	146.619	683.561	0	195.052	189.081	161.067	697.447	0	202.642	158.346
K00793	169.028	641.738	433.275	307.16	379.964	193.28	697.447	448.994	324.228	327.249
K00794	155.398	640.224	440.237	306.852	374.82	161.067	697.447	448.994	303.964	316.693
K00796	151.143	522.945	0	170.626	156.799	161.067	557.958	0	182.378	137.234
K00797	159.571	534.449	262.52	232.977	271.993	161.067	557.958	269.397	243.171	232.241
K00798	0	0	440.195	90.6853	179.579	0	0	448.994	101.321	158.346
K00799	1338.88	661.813	0	942.165	658.518	1449.6	697.447	0	1013.21	580.604
K00800	155.226	657.11	431.673	308.439	373.684	161.067	697.447	448.994	303.964	316.693
K00801	90.0083	0	0	59.5419	36.3531	96.6401	0	0	60.7927	31.6693
K00806	225.835	0	0	145.025	93.8272	225.494	0	0	141.85	73.895
K00809	65.0089	564.856	876.877	315.925	495.913	64.4268	557.958	897.989	324.228	422.257
K00812	151.716	677.956	0	196.125	190.256	161.067	697.447	0	202.642	158.346
K00817	173.698	258.473	174.708	185.93	201.741	193.28	418.468	179.598	222.907	190.016
K00820	149.615	682.244	439.445	289.938	369.213	161.067	697.447	448.994	303.964	316.693
K00821	157.492	541.67	257.59	214.595	235.671	161.067	557.958	269.397	243.171	232.241
K00822	0	663.301	0	95.8028	124.745	0	697.447	0	101.321	105.564
K00824	0	133.166	0	18.3317	23.1801	0	139.489	0	20.2642	21.1129
K00826	125.73	667.186	766.422	347.937	511.995	128.854	697.447	808.19	364.756	432.814
K00830	93.319	273.17	0	93.3897	82.6725	96.6401	278.979	0	101.321	73.895
K00831	34.2447	262.619	0	60.9921	63.5311	32.2134	278.979	0	60.7927	52.7821
K00833	0	0	432.691	102.265	190.639	0	0	448.994	101.321	158.346
K00835	121.978	0	0	79.7956	52.2231	128.854	0	0	81.057	42.2257
K00836	34.5642	0	171.005	62.6929	87.5819	32.2134	0	179.598	60.7927	73.895
K00837	121.464	0	0	80.3746	50.0383	128.854	0	0	81.057	42.2257
K00845	177.492	0	0	113.554	71.494	193.28	0	0	121.585	63.3386
K00847	155.098	0	0	98.2703	64.0381	161.067	0	0	101.321	52.7821
K00849	28.4971	129.771	0	41.4501	40.5737	32.2134	139.489	0	40.5285	31.6693
K00850	30.3233	0	0	19.4535	12.307	32.2134	0	0	20.2642	10.5564
K00851	129.212	0	0	77.4949	48.5796	128.854	0	0	81.057	42.2257
K00852	130.21	264.364	0	102.585	110.552	128.854	278.979	0	121.585	84.4514
K00854	0	131.422	0	18.3054	23.6148	0	139.489	0	20.2642	21.1129
K00855	209.185	0	0	140.285	90.8628	225.494	0	0	141.85	73.895
K00856	64.2045	666.908	0	128.38	140.109	64.4268	697.447	0	141.85	126.677
K00858	308.816	675.149	891.168	484.836	621.165	322.134	697.447	897.989	506.606	527.821
K00859	142.386	669.648	0	181.674	174.233	161.067	697.447	0	202.642	158.346
K00860	30.1855	0	0	18.9813	12.1386	32.2134	0	0	20.2642	10.5564
K00864	130.78	273.746	0	121.193	99.4727	128.854	278.979	0	121.585	84.4514
K00869	0	0	440.461	94.9151	182.956	0	0	448.994	101.321	158.346
K00872	146.969	0	432.564	190.946	249.656	161.067	0	448.994	202.642	211.129
K00873	368.099	133.977	0	258.924	174.308	386.561	139.489	0	263.435	147.79
K00876	59.9184	0	0	38.8459	24.2653	64.4268	0	0	40.5285	21.1129
K00884	67.0705	0	0	42.8878	29.4018	64.4268	0	0	40.5285	21.1129
K00886	89.1871	0	0	56.2438	35.3721	96.6401	0	0	60.7927	31.6693
K00887	28.5582	0	0	21.9948	12.4669	32.2134	0	0	20.2642	10.5564
K00891	160.096	646.256	0	198.571	190.459	161.067	697.447	0	202.642	158.346
K00912	0	669.736	0	92.2035	122.611	0	697.447	0	101.321	105.564
K00919	148.005	657.453	0	186.594	179.537	161.067	697.447	0	202.642	158.346
K00925	149.529	0	0	95.6627	59.3649	161.067	0	0	101.321	52.7821
K00927	148.062	660.413	454.168	298.795	386.734	161.067	697.447	448.994	303.964	316.693
K00928	124.403	520.883	433.204	267.587	329.248	161.067	697.447	448.994	303.964	316.693
K00930	173.845	525.009	0	177.799	159.567	161.067	557.958	0	182.378	137.234
K00931	148.884	617.338	0	198.965	193.554	161.067	697.447	0	202.642	158.346
K00936	201.255	0	0	134.909	86.3748	225.494	0	0	141.85	73.895
K00937	148.733	0	0	94.262	62.3494	161.067	0	0	101.321	52.7821
K00939	234.964	519.511	0	230.521	193.242	257.707	557.958	0	243.171	168.903
K00940	152.367	650.746	365.421	264.408	348.781	161.067	697.447	448.994	303.964	316.693
K00941	146.609	501.084	0	152.959	157.688	161.067	557.958	0	182.378	137.234
K00942	159.921	660.518	0	195.65	186.819	161.067	697.447	0	202.642	158.346
K00943	122.502	522.686	428.019	250.653	329.77	128.854	557.958	448.994	263.435	285.024
K00945	149.1	530.971	0	176.464	161.999	161.067	557.958	0	182.378	137.234
K00946	147.175	526.448	430.683	281.566	348.98	161.067	557.958	448.994	283.699	295.58
K00948	149.396	649.788	508.782	310.552	404.056	161.067	697.447	538.793	324.228	348.362
K00950	315.479	1039.76	170.744	383.694	391.916	322.134	1115.92	179.598	405.285	337.806
K00952	0	0	786.303	178.505	328.941	0	0	808.19	182.378	285.024
K00954	56.6846	649.062	0	127.865	143.512	128.854	697.447	0	182.378	147.79
K00955	0	130.21	0	19.7342	25.7231	0	139.489	0	20.2642	21.1129
K00956	0	130.21	0	19.7342	25.7231	0	139.489	0	20.2642	21.1129
K00957	0	133.479	0	18.8124	24.0186	0	139.489	0	20.2642	21.1129
K00958	154.073	0	425.479	188.587	239.835	161.067	0	448.994	202.642	211.129
K00962	147.17	751.076	0	224.153	227.515	161.067	697.447	0	202.642	158.346
K00963	58.9095	413.217	0	97.2102	78.9666	64.4268	418.468	0	101.321	84.4514
K00965	61.2773	0	433.836	138.554	210.531	64.4268	0	448.994	141.85	179.459
K00966	337.622	0	0	220.407	140.038	354.347	0	0	222.907	116.121
K00969	176.856	604.178	0	211.463	168.612	193.28	697.447	0	222.907	168.903
K00971	115.012	535.042	0	151.401	142.136	128.854	557.958	0	162.114	126.677
K00973	157.233	269.704	176.189	170.11	182.046	161.067	278.979	179.598	182.378	158.346
K00974	155.778	0	0	97.6751	49.0281	161.067	0	0	101.321	52.7821
K00975	183.882	0	0	117.129	75.5835	193.28	0	0	121.585	63.3386
K00978	128.006	125.194	345.931	178.649	226.285	128.854	139.489	359.195	182.378	190.016
K00979	29.1481	774.071	0	132.38	153.652	32.2134	836.937	0	141.85	137.234
K00980	0	0	365.793	78.0914	150.65	0	0	359.195	81.057	126.677
K00981	156.72	654.493	0	195.906	185.562	161.067	697.447	0	202.642	158.346
K00986	2207.83	0	0	1360.82	929.922	2126.08	0	0	1337.44	696.724
K00988	152.749	0	0	99.2261	65.2907	161.067	0	0	101.321	52.7821
K00989	127.466	271.523	0	123.132	102.222	128.854	278.979	0	121.585	84.4514
K00990	0	135.317	0	19.0428	25.2308	0	139.489	0	20.2642	21.1129
K00991	158.994	0	0	104.011	60.3926	161.067	0	0	101.321	52.7821
K00995	152.926	661.499	0	156.777	180.42	161.067	697.447	0	202.642	158.346
K00997	27.7301	636.981	173.78	148.732	202.523	32.2134	697.447	179.598	162.114	179.459
K01000	158.426	666.399	0	199.406	190.48	161.067	697.447	0	202.642	158.346
K01002	0	134.93	0	19.491	23.4879	0	139.489	0	20.2642	21.1129
K01005	237.905	0	0	160.235	100.775	257.707	0	0	162.114	84.4514
K01006	0	524.843	434.077	174.695	284.405	0	557.958	448.994	182.378	242.798
K01007	368.464	0	0	238.931	152.483	386.561	0	0	243.171	126.677
K01008	33.399	133.659	0	40.264	35.8109	32.2134	139.489	0	40.5285	31.6693
K01009	0	0	92.9331	19.0856	35.595	0	0	89.7989	20.2642	31.6693
K01011	248.815	598.293	1009.51	474.967	563.186	257.707	697.447	1167.38	526.87	601.716
K01012	177.158	0	439.724	208.346	252.623	193.28	0	448.994	222.907	221.685
K01021	25.9913	0	0	16.3698	11.1587	32.2134	0	0	20.2642	10.5564
K01046	92.8435	0	0	59.34	36.0375	96.6401	0	0	60.7927	31.6693
K01047	0	0	86.709	20.0429	36.8972	0	0	89.7989	20.2642	31.6693
K01053	184.93	0	0	118.414	76.7291	193.28	0	0	121.585	63.3386
K01054	117.067	0	0	75.0982	47.7632	128.854	0	0	81.057	42.2257
K01055	31.5936	0	0	20.1425	11.8274	32.2134	0	0	20.2642	10.5564
K01056	156.524	652.409	0	201.027	185.16	161.067	697.447	0	202.642	158.346
K01057	149.043	0	0	98.1982	61.7479	161.067	0	0	101.321	52.7821
K01061	392.487	0	251.475	306.945	265.958	418.774	0	269.397	324.228	232.241
K01066	93.5759	0	0	60.1578	38.9583	96.6401	0	0	60.7927	31.6693
K01069	317.045	1202.29	619.278	512.984	614.555	354.347	1255.4	628.592	547.135	527.821
K01070	122.37	0	0	75.4721	48.0858	128.854	0	0	81.057	42.2257
K01076	92.95	0	0	58.1594	37.5505	96.6401	0	0	60.7927	31.6693
K01077	95.7249	0	0	60.478	39.1997	96.6401	0	0	60.7927	31.6693
K01079	0	139.511	429.873	114.919	207.816	0	139.489	448.994	121.585	179.459
K01082	210.062	135.211	423.53	250.664	298.801	225.494	139.489	448.994	263.435	253.354
K01083	421.407	0	0	268.02	151.719	386.561	0	0	243.171	126.677
K01090	250.777	0	0	160.304	101.307	257.707	0	0	162.114	84.4514
K01091	236.216	633.391	0	260.445	221.983	257.707	697.447	0	263.435	190.016
K01092	151.963	638.868	0	189.083	182.53	161.067	697.447	0	202.642	158.346
K01095	0	523.538	0	68.8552	90.7043	0	557.958	0	81.057	84.4514
K01104	87.2971	0	0	56.6323	35.8533	96.6401	0	0	60.7927	31.6693
K01113	273.765	0	0	175.866	113.897	289.92	0	0	182.378	95.0079
K01118	62.637	648.842	0	138.761	161.658	64.4268	697.447	0	141.85	126.677
K01126	294.579	134.543	0	191.382	135.116	289.92	139.489	0	202.642	116.121
K01129	0	670.026	0	98.0396	125.374	0	697.447	0	101.321	105.564
K01136	29.8522	0	0	19.3542	12.4106	32.2134	0	0	20.2642	10.5564
K01139	150.939	0	0	97.9425	61.5396	161.067	0	0	101.321	52.7821
K01141	0	668.393	0	97.4329	125.463	0	697.447	0	101.321	105.564
K01142	124.539	518.647	0	159.197	146.32	128.854	557.958	0	162.114	126.677
K01147	150.229	0	0	93.54	58.9989	161.067	0	0	101.321	52.7821
K01150	28.2505	0	0	18.9559	13.6267	32.2134	0	0	20.2642	10.5564
K01151	0	0	413.491	97.0811	188.617	0	0	448.994	101.321	158.346
K01153	242.966	0	0	153.357	96.017	257.707	0	0	162.114	84.4514
K01154	388.997	0	0	263.363	169.29	418.774	0	0	263.435	137.234
K01156	29.9842	0	0	20.4917	12.9211	32.2134	0	0	20.2642	10.5564
K01159	155.732	0	0	91.8874	58.0079	161.067	0	0	101.321	52.7821
K01160	33.7816	0	0	20.4018	13.0714	32.2134	0	0	20.2642	10.5564
K01166	28.6389	0	0	15.6314	9.55859	32.2134	0	0	20.2642	10.5564
K01170	0	0	884.21	196.155	369.769	0	0	897.989	202.642	316.693
K01173	181.552	0	84.3552	140.872	112.538	193.28	0	89.7989	141.85	95.0079
K01174	347.676	658.485	437.845	416.642	453.565	354.347	697.447	448.994	425.549	380.031
K01176	29.6428	0	0	21.5053	14.2587	64.4268	0	0	40.5285	21.1129
K01178	92.7875	0	0	58.0465	36.4814	96.6401	0	0	60.7927	31.6693
K01179	124.705	0	0	81.8415	42.3314	128.854	0	0	81.057	42.2257
K01181	121.305	0	0	78.946	49.4003	128.854	0	0	81.057	42.2257
K01183	31.0875	0	0	21.8014	12.5697	32.2134	0	0	20.2642	10.5564
K01185	32.5903	0	0	21.7733	14.5912	32.2134	0	0	20.2642	10.5564
K01187	117.521	0	0	77.5079	47.0024	128.854	0	0	81.057	42.2257
K01191	119.032	0	0	75.9366	49.734	128.854	0	0	81.057	42.2257
K01192	28.9791	0	0	18.0686	11.247	32.2134	0	0	20.2642	10.5564
K01194	66.0613	0	0	42.3826	26.6758	64.4268	0	0	40.5285	21.1129
K01200	30.1385	0	0	21.3553	13.8622	32.2134	0	0	20.2642	10.5564
K01206	97.0043	0	0	58.7623	38.0904	96.6401	0	0	60.7927	31.6693
K01207	152.57	0	0	101.121	62.19	161.067	0	0	101.321	52.7821
K01208	149.822	0	0	98.284	63.0455	161.067	0	0	101.321	52.7821
K01214	156.384	0	0	98.46	61.2283	161.067	0	0	101.321	52.7821
K01233	29.8465	0	0	19.4422	11.9146	32.2134	0	0	20.2642	10.5564
K01236	94.4114	0	0	59.1409	37.7024	96.6401	0	0	60.7927	31.6693
K01239	94.6097	0	0	59.459	35.7712	96.6401	0	0	60.7927	31.6693
K01243	32.1873	386.168	0	75.1434	84.2876	32.2134	418.468	0	81.057	73.895
K01246	33.6308	0	436.678	114.437	192.658	32.2134	0	448.994	121.585	168.903
K01247	56.8589	516.026	0	129.005	137.237	64.4268	557.958	0	121.585	105.564
K01251	153.087	861.085	590.548	303.413	403.022	161.067	697.447	448.994	303.964	316.693
K01255	151.549	659.081	436.459	288.387	373.489	161.067	697.447	448.994	303.964	316.693
K01256	152.006	0	0	98.1884	63.2163	161.067	0	0	101.321	52.7821
K01259	84.0072	0	0	52.6303	36.4427	96.6401	0	0	60.7927	31.6693
K01262	159.032	671.219	0	197.06	186.71	161.067	697.447	0	202.642	158.346
K01265	277.969	679.314	452.037	368.161	428.21	289.92	697.447	448.994	385.021	358.919
K01271	0	137.232	0	17.5456	23.4489	0	139.489	0	20.2642	21.1129
K01273	29.1395	667.653	0	116.292	136.27	32.2134	697.447	0	121.585	116.121
K01286	89.7647	0	89.4163	77.7889	68.9171	96.6401	0	89.7989	81.057	63.3386
K01295	29.9509	0	0	19.4574	12.9166	32.2134	0	0	20.2642	10.5564
K01297	251.737	0	0	158.893	103.255	257.707	0	0	162.114	84.4514
K01299	0	129.643	0	17.2727	23.2566	0	139.489	0	20.2642	21.1129
K01304	58.1858	0	0	38.5787	28.2653	64.4268	0	0	40.5285	21.1129
K01318	27.0852	0	0	19.3646	12.5198	32.2134	0	0	20.2642	10.5564
K01322	150.227	0	0	98.9209	61.3263	161.067	0	0	101.321	52.7821
K01338	0	671.594	0	101.118	126.632	0	697.447	0	101.321	105.564
K01342	34.2765	0	0	23.0365	13.1909	32.2134	0	0	20.2642	10.5564
K01354	31.9706	541.34	0	104.361	117.388	32.2134	557.958	0	101.321	95.0079
K01356	81.7682	668.65	0	148.875	158.143	96.6401	697.447	0	162.114	137.234
K01358	592.188	664.642	0	485.785	367.415	644.268	697.447	0	506.606	316.693
K01406	2595.58	0	168.935	1718.85	1197.03	2544.86	0	89.7989	1621.14	865.627
K01409	151.9	691.516	449.229	292.416	374.749	161.067	697.447	448.994	303.964	316.693
K01414	121.097	0	0	76.8304	47.8279	128.854	0	0	81.057	42.2257
K01419	0	732.203	0	107.067	126.688	0	697.447	0	101.321	105.564
K01423	397.798	0	0	251.744	161.608	418.774	0	0	263.435	137.234
K01424	0	0	347.733	74.9525	149.185	0	0	359.195	81.057	126.677
K01425	149.525	0	0	96.9637	61.9585	161.067	0	0	101.321	52.7821
K01426	399.459	658.798	439.853	438.348	461.602	418.774	697.447	448.994	466.078	401.144
K01428	188.315	0	256.984	174.742	185.555	193.28	0	269.397	182.378	158.346
K01429	177.665	0	255.012	173.806	182.303	193.28	0	269.397	182.378	158.346
K01430	180.177	0	258.048	165.291	182.592	193.28	0	269.397	182.378	158.346
K01432	30.4925	0	0	18.829	11.9505	32.2134	0	0	20.2642	10.5564
K01433	115.74	0	419.313	170.712	220.045	128.854	0	448.994	182.378	200.572
K01434	63.5144	0	0	40.45	25.6895	64.4268	0	0	40.5285	21.1129
K01436	152.905	0	0	96.8653	63.3288	161.067	0	0	101.321	52.7821
K01438	0	399.454	0	62.5989	79.4526	0	418.468	0	60.7927	63.3386
K01439	0	535.246	0	83.0987	101.648	0	697.447	0	101.321	105.564
K01443	157.086	0	0	99.8918	64.5834	161.067	0	0	101.321	52.7821
K01447	54.5295	639.544	0	133.498	144.706	64.4268	697.447	0	141.85	126.677
K01448	582.475	0	0	371.557	233.314	612.054	0	0	385.021	200.572
K01455	61.4154	0	0	38.096	24.1779	64.4268	0	0	40.5285	21.1129
K01458	0	0	432.735	99.4035	184.296	0	0	448.994	101.321	158.346
K01462	268.287	711.143	0	260.773	233.303	289.92	697.447	0	283.699	200.572
K01463	30.8713	0	0	18.3504	12.9286	32.2134	0	0	20.2642	10.5564
K01465	182.506	929.273	0	233.078	251.972	193.28	976.426	0	263.435	211.129
K01469	152.486	0	0	98.6706	63.223	161.067	0	0	101.321	52.7821
K01470	198.882	0	450.104	221.587	265.519	225.494	0	448.994	243.171	232.241
K01474	85.3772	0	0	59.6658	37.8851	96.6401	0	0	60.7927	31.6693
K01480	250.307	799.034	795.867	457.506	547.624	257.707	836.937	808.19	466.078	496.152
K01481	29.0076	0	0	19.3672	11.8704	32.2134	0	0	20.2642	10.5564
K01483	120.274	0	0	80.497	51.895	128.854	0	0	81.057	42.2257
K01485	56.4548	0	0	39.8821	24.7567	64.4268	0	0	40.5285	21.1129
K01486	0	0	434.728	95.3341	184.525	0	0	448.994	101.321	158.346
K01489	55.7629	0	0	37.5096	23.6947	64.4268	0	0	40.5285	21.1129
K01491	155.57	528.222	349.545	272.888	339.47	161.067	697.447	359.195	283.699	285.024
K01493	60.895	0	467.009	129.672	204.063	64.4268	0	448.994	141.85	179.459
K01494	124.1	668.68	0	175.376	168.186	128.854	697.447	0	182.378	147.79
K01495	298.898	528.303	439.477	353.584	390.91	322.134	557.958	448.994	385.021	348.362
K01496	150.248	0	0	103.779	66.9836	161.067	0	0	101.321	52.7821
K01497	124.488	0	0	80.1915	51.0364	128.854	0	0	81.057	42.2257
K01501	57.8651	0	0	39.1007	26.1948	64.4268	0	0	40.5285	21.1129
K01505	31.2772	0	0	20.5064	13.4972	32.2134	0	0	20.2642	10.5564
K01507	170.26	143.323	432.764	217.213	272.985	161.067	139.489	448.994	222.907	232.241
K01512	151.053	0	416.276	197.292	242.072	161.067	0	448.994	202.642	211.129
K01515	146.486	0	308.601	170.136	203.531	161.067	0	359.195	182.378	179.459
K01518	0	0	429.21	97.2207	185.424	0	0	448.994	101.321	158.346
K01520	91.185	645.535	0	150.629	153.67	96.6401	697.447	0	162.114	137.234
K01524	149.626	0	0	96.935	65.3393	161.067	0	0	101.321	52.7821
K01529	0	0	343.163	83.8213	145.667	0	0	359.195	81.057	126.677
K01533	301.36	0	0	173.281	111.209	322.134	0	0	202.642	105.564
K01534	154.154	0	0	98.2547	52.8416	161.067	0	0	101.321	52.7821
K01537	120.626	0	0	74.9244	47.519	128.854	0	0	81.057	42.2257
K01546	87.8116	0	0	57.0242	36.6075	96.6401	0	0	60.7927	31.6693
K01547	96.4954	0	0	61.2785	39.7158	96.6401	0	0	60.7927	31.6693
K01548	87.6157	0	0	56.5515	36.3103	96.6401	0	0	60.7927	31.6693
K01551	430.005	0	0	276.377	173.25	450.987	0	0	283.699	147.79
K01552	27.9446	0	0	17.662	11.1754	32.2134	0	0	20.2642	10.5564
K01560	29.2795	395.423	0	83.3677	89.6864	32.2134	418.468	0	81.057	73.895
K01561	0	134.25	0	19.8238	24.3564	0	139.489	0	20.2642	21.1129
K01568	32.9778	0	0	20.0169	12.3377	32.2134	0	0	20.2642	10.5564
K01574	36.9605	0	0	19.0005	12.5193	32.2134	0	0	20.2642	10.5564
K01575	31.9945	0	0	19.7931	12.3873	32.2134	0	0	20.2642	10.5564
K01576	60.0677	0	0	40.2875	24.4792	64.4268	0	0	40.5285	21.1129
K01578	0	534.748	0	78.8188	102.787	0	557.958	0	81.057	84.4514
K01579	160.524	0	0	97.0595	60.9214	161.067	0	0	101.321	52.7821
K01581	0	516.334	0	74.2004	93.9504	0	557.958	0	81.057	84.4514
K01585	300.669	0	0	193.424	124.519	322.134	0	0	202.642	105.564
K01586	186.863	647.173	0	213.926	197.899	193.28	697.447	0	222.907	168.903
K01588	144.472	646.696	422.635	291.074	372.91	161.067	697.447	448.994	303.964	316.693
K01589	153.022	672.845	424.676	299.267	373.874	161.067	697.447	448.994	303.964	316.693
K01590	56.9682	0	0	35.4779	21.8177	64.4268	0	0	40.5285	21.1129
K01591	183.94	650.434	441.805	291.76	380.999	193.28	697.447	448.994	324.228	327.249
K01595	148.162	534.045	0	176.662	159.637	161.067	557.958	0	182.378	137.234
K01599	143.193	668.834	0	191.952	183.433	161.067	697.447	0	202.642	158.346
K01601	148.341	0	0	97.0404	57.3265	161.067	0	0	101.321	52.7821
K01602	164.55	0	0	116.708	71.215	161.067	0	0	101.321	52.7821
K01607	191.272	134.098	0	146.343	106.771	96.6401	139.489	0	81.057	52.7821
K01609	239.42	0	0	152.908	100.58	257.707	0	0	162.114	84.4514
K01610	60.7627	0	449.454	134.685	205.625	64.4268	0	448.994	141.85	179.459
K01611	79.8277	534.95	0	130.418	131.358	96.6401	557.958	0	141.85	116.121
K01613	0	646.301	0	97.2839	125.426	0	697.447	0	101.321	105.564
K01619	144.608	0	0	93.7837	59.272	161.067	0	0	101.321	52.7821
K01620	28.5523	400.282	0	78.7245	88.4451	32.2134	418.468	0	81.057	73.895
K01621	150.024	0	0	96.9856	61.3987	161.067	0	0	101.321	52.7821
K01622	0	0	437.825	106.67	191.299	0	0	448.994	101.321	158.346
K01623	57.6863	515.118	0	123.697	131.331	64.4268	557.958	0	121.585	105.564
K01624	161.97	131.484	0	118.653	84.9393	161.067	139.489	0	121.585	73.895
K01625	155.992	0	0	92.7769	61.02	161.067	0	0	101.321	52.7821
K01626	91.7393	671.119	0	151.564	155.752	96.6401	697.447	0	162.114	137.234
K01627	31.5148	665.513	0	124.172	140.774	32.2134	697.447	0	121.585	116.121
K01628	0	130.366	0	20.2847	25.5341	0	139.489	0	20.2642	21.1129
K01633	153.339	258.465	0	130.807	106.523	161.067	278.979	0	141.85	95.0079
K01637	24.6673	393.092	0	81.8335	90.2411	32.2134	418.468	0	81.057	73.895
K01638	52.5106	923.875	0	179.469	200.122	64.4268	976.426	0	182.378	168.903
K01641	27.3801	0	423.586	108.538	186.423	32.2134	0	448.994	121.585	168.903
K01644	0	0	344.8	78.3462	150.315	0	0	359.195	81.057	126.677
K01647	187.722	528.81	433.707	293.312	357.353	193.28	557.958	448.994	303.964	306.136
K01649	333.014	1172.67	334.309	462.571	443.499	354.347	1255.4	359.195	486.342	432.814
K01652	299.37	672.078	782.847	472.849	593.806	322.134	697.447	808.19	486.342	496.152
K01653	142.047	653.079	435.566	303.854	373.337	161.067	697.447	448.994	303.964	316.693
K01654	0	0	87.2393	16.4564	37.1954	0	0	89.7989	20.2642	31.6693
K01655	33.8232	0	0	20.7872	12.5584	32.2134	0	0	20.2642	10.5564
K01657	178.927	675.978	442.582	313.625	389.684	193.28	697.447	448.994	324.228	327.249
K01658	218.328	397.877	434.008	303.733	356.284	225.494	418.468	448.994	303.964	295.58
K01659	0	125.135	0	39.6097	50.1679	0	278.979	0	40.5285	42.2257
K01661	153.341	0	0	103.278	63.6825	161.067	0	0	101.321	52.7821
K01662	153.525	665.917	0	199.901	191.172	161.067	697.447	0	202.642	158.346
K01664	157.774	0	0	99.8841	64.2256	161.067	0	0	101.321	52.7821
K01665	126.446	0	0	78.5238	48.3599	128.854	0	0	81.057	42.2257
K01668	33.0707	0	0	20.7008	13.3422	32.2134	0	0	20.2642	10.5564
K01669	235.726	525.942	172.534	278.451	276.151	257.707	557.958	179.598	283.699	232.241
K01673	384.028	0	0	242.207	155.263	418.774	0	0	263.435	137.234
K01674	28.5659	0	0	17.9075	11.1811	32.2134	0	0	20.2642	10.5564
K01679	60.5945	675.911	0	137.168	153.227	64.4268	697.447	0	141.85	126.677
K01681	0	549.883	0	77.9635	124.144	0	697.447	0	101.321	105.564
K01682	146.862	0	0	94.5742	60.7598	161.067	0	0	101.321	52.7821
K01686	33.8692	0	0	22.029	13.6782	32.2134	0	0	20.2642	10.5564
K01687	123.886	671.199	433.03	276.984	367.106	161.067	697.447	448.994	303.964	316.693
K01689	150.429	652.831	442.104	307.247	381.144	161.067	697.447	448.994	303.964	316.693
K01692	0	0	322.106	98.7127	188.099	0	0	448.994	101.321	158.346
K01693	125.736	627.886	0	166.869	168.056	128.854	697.447	0	182.378	147.79
K01695	216.671	806.907	439.078	369.882	432.875	225.494	836.937	448.994	364.756	358.919
K01696	212.03	131.702	428.411	229.133	291.559	225.494	139.489	448.994	263.435	253.354
K01698	244.397	648.197	446.028	357.084	411.562	257.707	697.447	448.994	364.756	348.362
K01703	183.064	531.23	882.064	343.126	522.97	193.28	697.447	897.989	425.549	485.596
K01704	167.062	651.916	863.892	399.281	563.33	161.067	697.447	897.989	405.285	475.039
K01709	83.774	125.622	0	73.0126	57.4354	96.6401	139.489	0	81.057	52.7821
K01710	157.511	0	255.076	153.914	167.377	161.067	0	269.397	162.114	147.79
K01711	256.508	388.492	177.762	254.59	243.78	257.707	418.468	179.598	263.435	211.129
K01713	0	664.912	0	106.117	132.444	0	697.447	0	101.321	105.564
K01714	145.529	759.016	0	217.491	211.747	161.067	836.937	0	222.907	179.459
K01715	0	0	263.805	76.7701	152.093	0	0	448.994	101.321	158.346
K01716	0	640.497	0	91.7123	120.34	0	697.447	0	101.321	105.564
K01719	212.18	511.464	439.655	313.273	376.497	225.494	557.958	448.994	324.228	316.693
K01720	0	533.354	0	78.6834	98.9336	0	557.958	0	81.057	84.4514
K01721	32.819	0	0	23.9841	14.1468	32.2134	0	0	20.2642	10.5564
K01724	177.123	639.379	421.498	313.088	391.248	193.28	557.958	448.994	303.964	306.136
K01725	82.5959	0	0	50.257	31.8717	96.6401	0	0	60.7927	31.6693
K01726	82.5871	536.303	0	123.832	129.85	96.6401	557.958	0	141.85	116.121
K01733	342.806	669.272	884.66	500.04	628.281	354.347	697.447	897.989	526.87	538.378
K01734	63.1895	0	0	42.3086	28.0911	64.4268	0	0	40.5285	21.1129
K01735	245.439	539.852	0	236.532	201.948	257.707	557.958	0	243.171	168.903
K01736	159.701	669.185	527.848	319.378	378.114	161.067	697.447	448.994	303.964	316.693
K01737	215.119	0	450.297	228.854	270.482	225.494	0	448.994	243.171	232.241
K01738	419.296	0	0	267.186	171.798	450.987	0	0	283.699	147.79
K01739	0	134.616	0	19.3376	24.805	0	139.489	0	20.2642	21.1129
K01740	56.5763	793.931	0	156.502	175.612	64.4268	836.937	0	162.114	147.79
K01744	88.2259	0	268.127	118.932	183.158	96.6401	0	359.195	141.85	158.346
K01745	25.6375	0	0	16.0653	10.2337	32.2134	0	0	20.2642	10.5564
K01749	152.626	663.292	442.825	297.573	383.781	161.067	697.447	448.994	303.964	316.693
K01751	0	405.194	0	56.2462	72.2816	0	418.468	0	60.7927	63.3386
K01754	178.116	0	435.802	216.326	262.114	193.28	0	448.994	222.907	221.685
K01755	154.158	653.702	434.566	290.887	366.975	161.067	697.447	448.994	303.964	316.693
K01756	149.986	653.844	439.689	285.245	366.922	161.067	697.447	448.994	303.964	316.693
K01759	108.849	765.582	0	190.374	194.19	128.854	836.937	0	202.642	168.903
K01768	1257.89	0	0	813.561	521.261	1320.75	0	0	830.834	432.814
K01770	155.498	0	0	96.4365	61.7906	161.067	0	0	101.321	52.7821
K01772	348.058	665.664	0	326.277	266.624	354.347	697.447	0	324.228	221.685
K01775	151.556	267.48	0	142.825	117.791	161.067	278.979	0	141.85	95.0079
K01776	146.603	0	441.119	190.308	242.035	161.067	0	448.994	202.642	211.129
K01778	157.035	647.851	0	216.349	186.735	161.067	697.447	0	202.642	158.346
K01779	0	390.095	0	61.5644	77.0342	0	418.468	0	60.7927	63.3386
K01783	152.934	672.763	0	194.032	184.914	161.067	697.447	0	202.642	158.346
K01784	267.213	262.42	352.269	290.986	303.356	289.92	278.979	359.195	303.964	263.911
K01785	124.641	127.925	0	95.0416	71.2011	128.854	139.489	0	101.321	63.3386
K01787	97.2682	0	0	62.3757	40.079	96.6401	0	0	60.7927	31.6693
K01788	53.2594	0	0	37.1298	23.009	64.4268	0	0	40.5285	21.1129
K01790	268.125	134.738	513.574	304.278	346.669	289.92	139.489	538.793	324.228	306.136
K01791	153.926	0	88.5753	111.645	97.0765	161.067	0	89.7989	121.585	84.4514
K01792	185.288	0	0	118.642	74.3129	193.28	0	0	121.585	63.3386
K01799	0	399.591	0	56.1031	75.4355	0	418.468	0	60.7927	63.3386
K01802	150.51	0	0	91.3386	61.9385	161.067	0	0	101.321	52.7821
K01803	158.15	639.875	438.627	305.108	389.76	161.067	697.447	448.994	303.964	316.693
K01805	0	133.471	0	20.2511	24.7907	0	139.489	0	20.2642	21.1129
K01807	159.683	0	440.596	207.438	254.541	161.067	0	448.994	202.642	211.129
K01808	0	658.248	0	102.004	128.404	0	697.447	0	101.321	105.564
K01810	150.756	0	0	96.6328	58.8263	161.067	0	0	101.321	52.7821
K01812	28.6603	0	0	19.5338	12.4909	32.2134	0	0	20.2642	10.5564
K01814	149.33	515.963	434.349	270.651	342.98	161.067	557.958	448.994	283.699	295.58
K01817	144.866	0	0	93.4455	55.1179	161.067	0	0	101.321	52.7821
K01821	0	0	409.092	85.2957	172.849	0	0	448.994	101.321	158.346
K01822	24.7431	0	0	18.4622	12.5612	32.2134	0	0	20.2642	10.5564
K01823	57.5417	0	437.942	139.619	212.676	64.4268	0	448.994	141.85	179.459
K01834	28.4632	674.043	0	112.849	134.293	32.2134	697.447	0	121.585	116.121
K01835	122.863	0	0	79.9893	50.3065	128.854	0	0	81.057	42.2257
K01838	339.059	0	0	215.744	140.27	354.347	0	0	222.907	116.121
K01845	395.061	133.455	787.395	474.988	553.866	418.774	139.489	897.989	486.342	475.039
K01848	0	0	444.382	99.7555	191.664	0	0	448.994	101.321	158.346
K01849	0	0	349.691	95.7769	177.259	0	0	448.994	101.321	158.346
K01854	31.2231	0	0	20.1235	12.8141	32.2134	0	0	20.2642	10.5564
K01858	64.3378	0	443.08	137.205	205.815	64.4268	0	448.994	141.85	179.459
K01866	149.54	656.625	417.718	302.992	376.565	161.067	697.447	448.994	303.964	316.693
K01867	147.198	671.514	431.934	284.418	367.654	161.067	697.447	448.994	303.964	316.693
K01868	246.156	673.269	436.833	360.617	409.765	257.707	697.447	448.994	364.756	348.362
K01869	152.827	657.189	264.59	296.664	378.333	161.067	697.447	448.994	303.964	316.693
K01870	153.27	670.355	444.234	295.358	373.638	161.067	697.447	448.994	303.964	316.693
K01872	154.28	741.891	440.453	296.428	377.075	161.067	697.447	448.994	303.964	316.693
K01873	156.09	673.231	348.164	290.964	376.335	161.067	697.447	448.994	303.964	316.693
K01874	181.35	699.852	436.052	313.68	383.007	193.28	697.447	448.994	324.228	327.249
K01875	149.495	669.494	554.667	290.097	375.627	161.067	697.447	448.994	303.964	316.693
K01876	149.7	663.139	0	195.925	185.149	161.067	697.447	0	202.642	158.346
K01878	148.721	531.578	0	169.182	153.655	161.067	557.958	0	182.378	137.234
K01879	151.037	534.98	0	175.371	161.324	161.067	557.958	0	182.378	137.234
K01880	0	135.447	435.543	116.686	213.234	0	139.489	448.994	121.585	179.459
K01881	153.454	672.02	444.613	299.492	374.818	161.067	697.447	448.994	303.964	316.693
K01883	182.71	664.892	445.54	314.149	392.96	193.28	697.447	448.994	324.228	327.249
K01885	154.994	663.605	0	198.838	190.815	161.067	697.447	0	202.642	158.346
K01887	147.123	673.201	435.389	297.354	378.049	161.067	697.447	448.994	303.964	316.693
K01889	148.607	664.483	435.982	299.811	380.115	161.067	697.447	448.994	303.964	316.693
K01890	151.461	654.955	432.246	293.052	372.728	161.067	697.447	448.994	303.964	316.693
K01892	156.604	659.917	434.671	289.339	370.989	161.067	697.447	448.994	303.964	316.693
K01893	157.429	0	0	99.5931	64.5398	161.067	0	0	101.321	52.7821
K01895	149.231	679.526	443.8	287.43	363.142	161.067	697.447	448.994	303.964	316.693
K01897	218.495	531.319	0	219.808	166.645	225.494	557.958	0	222.907	158.346
K01899	0	131.754	0	21.2921	27.4507	0	139.489	0	20.2642	21.1129
K01902	53.5002	515.031	440.447	231.925	335.997	64.4268	697.447	448.994	243.171	285.024
K01903	0	652.965	0	97.6029	123.208	0	697.447	0	101.321	105.564
K01904	31.4782	0	0	21.0616	13.3788	32.2134	0	0	20.2642	10.5564
K01907	31.7806	269.81	0	55.7554	59.0503	32.2134	278.979	0	60.7927	52.7821
K01908	0	535.049	0	77.24	98.5398	0	557.958	0	81.057	84.4514
K01911	124.284	0	0	80.0938	49.5044	128.854	0	0	81.057	42.2257
K01912	127.459	0	0	79.1513	50.8334	128.854	0	0	81.057	42.2257
K01915	271.771	2272.59	884.511	700.412	894.864	289.92	2371.32	897.989	729.513	770.619
K01918	149.1	677.77	0	193.045	180.739	161.067	697.447	0	202.642	158.346
K01919	0	873.459	0	119.644	151.416	0	697.447	0	101.321	105.564
K01920	206.03	648.838	0	236.99	208.654	225.494	697.447	0	243.171	179.459
K01921	151.464	666.111	442.551	289.183	367.335	161.067	697.447	448.994	303.964	316.693
K01923	150.445	649.777	454.837	290.186	366.24	161.067	697.447	448.994	303.964	316.693
K01924	147.081	645.108	0	180.026	170.367	161.067	697.447	0	202.642	158.346
K01925	146.703	0	0	94.7823	60.7151	161.067	0	0	101.321	52.7821
K01928	152.928	534.505	0	177.531	161.62	161.067	557.958	0	182.378	137.234
K01929	159.887	398.179	0	158.019	139.268	161.067	418.468	0	162.114	116.121
K01933	145.01	668.723	430.293	284.993	362.691	161.067	697.447	448.994	303.964	316.693
K01934	149.101	660.643	428.77	288.67	373.632	161.067	697.447	448.994	303.964	316.693
K01935	151.557	0	427.862	195.33	244.642	161.067	0	448.994	202.642	211.129
K01937	151.455	917.435	468.39	296.912	373.972	161.067	697.447	448.994	303.964	316.693
K01938	0	538.133	0	77.7746	97.6956	0	557.958	0	81.057	84.4514
K01939	149.264	657.312	436.065	324.241	377.119	161.067	697.447	448.994	303.964	316.693
K01940	143.901	671.953	489.125	301.143	386.506	161.067	697.447	448.994	303.964	316.693
K01945	154.2	661.495	432.75	287.152	362.73	161.067	697.447	448.994	303.964	316.693
K01949	29.2386	523.352	0	90.8256	106.909	32.2134	557.958	0	101.321	95.0079
K01950	158.816	0	0	100.255	63.1625	161.067	0	0	101.321	52.7821
K01951	207.778	804.002	791.706	421.879	609.576	225.494	836.937	897.989	466.078	517.265
K01953	278.216	409.923	694.106	394.146	502.594	289.92	418.468	718.391	405.285	411.701
K01955	156.673	545.22	0	194.008	184.669	161.067	697.447	0	202.642	158.346
K01956	149.406	403.288	0	169.431	155.422	161.067	557.958	0	182.378	137.234
K01958	0	131.44	0	21.2308	25.664	0	139.489	0	20.2642	21.1129
K01961	152.146	525.137	0	176.253	163.178	161.067	557.958	0	182.378	137.234
K01962	142.863	665.3	0	192.742	190.88	161.067	697.447	0	202.642	158.346
K01963	149.446	528.203	0	172.507	165.155	161.067	557.958	0	182.378	137.234
K01972	189.027	667.045	0	220.416	203.231	193.28	697.447	0	222.907	168.903
K01974	92.2543	0	442.097	152.695	213.156	96.6401	0	448.994	162.114	190.016
K01975	0	0	434.685	93.2056	179.536	0	0	448.994	101.321	158.346
K01989	0	0	90.0011	21.7187	38.434	0	0	89.7989	20.2642	31.6693
K01990	1035.19	1058.13	882.117	1014.93	964.524	1063.04	1115.92	897.989	1033.48	833.958
K01991	337.619	0	0	215.726	137.369	354.347	0	0	222.907	116.121
K01992	336.599	0	82.3032	214.572	136.125	354.347	0	89.7989	243.171	147.79
K01993	29.493	0	0	18.6528	11.9152	32.2134	0	0	20.2642	10.5564
K01995	174.93	1294.09	0	306.693	317.293	161.067	1394.89	0	303.964	263.911
K01996	151.128	887.344	0	222.315	247.085	161.067	976.426	0	243.171	200.572
K01997	324.572	1389.1	79.7112	450.29	448.967	354.347	1534.38	89.7989	466.078	380.031
K01998	174.289	397.112	0	170.315	145.723	193.28	418.468	0	182.378	126.677
K01999	576.049	1166.21	85.6284	566.511	477.285	612.054	1255.4	89.7989	587.663	422.257
K02000	28.2604	923.011	0	155.722	184.551	32.2134	976.426	0	162.114	158.346
K02001	28.1153	1183.66	0	192.555	232.065	32.2134	1255.4	0	202.642	200.572
K02002	63.5874	1165.41	0	211.974	251.66	64.4268	1255.4	0	222.907	211.129
K02003	711.494	635.326	170.892	595.485	473.914	805.335	697.447	179.598	648.456	432.814
K02004	1002.62	1169.29	442.534	897.801	787.151	1095.26	1115.92	448.994	952.42	686.168
K02005	548.321	0	0	349.659	218.186	579.841	0	0	364.756	190.016
K02006	120.369	0	0	79.3615	49.9595	128.854	0	0	81.057	42.2257
K02007	155.536	0	0	102.478	64.1355	161.067	0	0	101.321	52.7821
K02008	129.054	0	0	74.6089	48.2942	128.854	0	0	81.057	42.2257
K02009	62.4864	0	0	43.2791	28.5154	64.4268	0	0	40.5285	21.1129
K02010	118.673	0	0	79.1824	51.6439	128.854	0	0	81.057	42.2257
K02011	119.736	926.18	0	210.223	220.289	128.854	976.426	0	222.907	190.016
K02012	146.342	675.518	0	186.349	178.794	161.067	697.447	0	202.642	158.346
K02013	212.233	0	0	138.716	88.5454	225.494	0	0	141.85	73.895
K02014	500.839	0	0	314.591	186.122	515.414	0	0	324.228	168.903
K02015	416.393	0	0	279.988	166.374	450.987	0	0	283.699	147.79
K02016	557.958	0	434.818	426.936	406.276	579.841	0	448.994	466.078	348.362
K02017	66.3154	0	0	44.7783	27.8945	64.4268	0	0	40.5285	21.1129
K02018	125.241	0	0	82.2343	51.9611	128.854	0	0	81.057	42.2257
K02020	217.325	0	0	138.686	90.1338	225.494	0	0	141.85	73.895
K02021	30.9944	0	0	20.3136	13.8262	32.2134	0	0	20.2642	10.5564
K02022	217.379	0	0	137.206	89.0222	225.494	0	0	141.85	73.895
K02025	345.81	657.904	0	314.951	257.443	354.347	697.447	0	324.228	221.685
K02026	339.533	133.046	0	234.959	164.849	354.347	139.489	0	243.171	137.234
K02027	414.096	267.246	0	305.249	219.159	450.987	278.979	0	324.228	190.016
K02028	218.365	811.683	0	226.155	221.143	225.494	836.937	0	263.435	200.572
K02029	283.837	1183.22	0	356.095	329.209	289.92	1255.4	0	364.756	285.024
K02030	622.531	1295.1	0	592.277	495.66	644.268	1394.89	0	607.927	422.257
K02031	268.052	401.174	0	230.706	184.468	289.92	418.468	0	243.171	158.346
K02032	268.052	259.843	256.115	269.276	263.059	289.92	278.979	359.195	303.964	263.911
K02033	371.529	401.887	443.477	398.349	415.996	386.561	418.468	448.994	405.285	348.362
K02034	357.716	405.036	437.225	389.961	410.13	386.561	418.468	448.994	405.285	348.362
K02035	449.042	404.117	0	349.138	255.841	483.201	418.468	0	364.756	221.685
K02036	388.553	534.161	249.258	380.831	365.058	418.774	557.958	269.397	405.285	316.693
K02037	360.212	523.053	435.048	402.444	435.09	386.561	557.958	448.994	425.549	369.475
K02038	359.535	529.407	260.315	369.997	365.123	386.561	557.958	269.397	385.021	306.136
K02039	148.42	513.357	264.1	228.734	273.458	161.067	557.958	269.397	243.171	232.241
K02040	1240.43	533.911	265.31	918.794	712.873	1320.75	557.958	269.397	972.684	612.273
K02041	119.337	132.395	94.4344	117.277	111.002	128.854	139.489	89.7989	121.585	95.0079
K02042	152.223	262.249	350.104	217.006	262.877	161.067	278.979	359.195	222.907	221.685
K02044	271.786	129.346	525.279	316.502	364.324	289.92	139.489	538.793	324.228	306.136
K02045	95.0186	0	0	59.2051	38.5766	96.6401	0	0	60.7927	31.6693
K02046	88.6685	0	0	51.2444	33.0157	96.6401	0	0	60.7927	31.6693
K02047	92.0005	0	0	60.2841	39.7905	96.6401	0	0	60.7927	31.6693
K02049	329.568	134.795	420.937	318.906	340.824	354.347	139.489	448.994	344.492	295.58
K02050	483.302	804.929	427.966	523.828	526.116	515.414	836.937	448.994	547.135	453.926
K02051	767.57	130.373	397.805	605.523	516.377	805.335	139.489	448.994	628.192	443.37
K02052	89.5581	130.505	0	117.017	110.023	96.6401	418.468	0	121.585	95.0079
K02053	33.9343	395.53	0	78.918	86.7188	64.4268	418.468	0	101.321	84.4514
K02054	29.9261	413.899	0	74.063	82.2962	32.2134	418.468	0	81.057	73.895
K02055	0	128.4	0	19.3242	24.2732	0	139.489	0	20.2642	21.1129
K02056	30.3517	0	0	20.4142	12.637	32.2134	0	0	20.2642	10.5564
K02057	29.8224	0	0	19.2117	12.1491	32.2134	0	0	20.2642	10.5564
K02058	0	132.265	0	18.6703	23.6911	0	139.489	0	20.2642	21.1129
K02064	0	131.756	0	21.4911	26.7309	0	139.489	0	20.2642	21.1129
K02065	179.427	0	0	116.845	76.6292	193.28	0	0	121.585	63.3386
K02066	218.944	129.7	0	158.894	113.899	225.494	139.489	0	162.114	95.0079
K02067	188.242	0	0	114.128	71.6023	193.28	0	0	121.585	63.3386
K02068	27.9955	0	0	19.9545	12.7767	32.2134	0	0	20.2642	10.5564
K02069	171.594	0	0	110.206	67.9663	193.28	0	0	121.585	63.3386
K02074	0	0	79.4086	19.1382	34.3218	0	0	89.7989	20.2642	31.6693
K02078	206.49	673.806	0	232.502	211.192	225.494	697.447	0	243.171	179.459
K02083	31.8505	266.844	0	60.588	63.6174	32.2134	278.979	0	60.7927	52.7821
K02084	105.195	0	0	64.5508	35.9554	96.6401	0	0	60.7927	31.6693
K02092	118.919	0	0	78.6293	51.2177	128.854	0	0	81.057	42.2257
K02093	123.127	0	0	83.5406	53.2494	128.854	0	0	81.057	42.2257
K02094	109.069	0	0	71.8012	46.0293	128.854	0	0	81.057	42.2257
K02095	119.488	0	0	74.3729	45.231	128.854	0	0	81.057	42.2257
K02096	126.528	0	0	79.9354	51.2822	128.854	0	0	81.057	42.2257
K02097	116.256	0	0	78.6403	51.8922	128.854	0	0	81.057	42.2257
K02107	0	0	426.374	98.9412	184.875	0	0	448.994	101.321	158.346
K02108	179.644	605.11	0	205.741	173.989	193.28	697.447	0	222.907	168.903
K02109	337.397	1288.46	0	409.381	379.097	354.347	1394.89	0	425.549	327.249
K02110	174.124	496.878	0	192.117	178.862	193.28	697.447	0	222.907	168.903
K02111	186.553	645.627	0	229.134	199.956	193.28	697.447	0	222.907	168.903
K02112	188.744	592.574	0	219.691	203.911	193.28	697.447	0	222.907	168.903
K02113	149.34	662.332	0	195.33	185.459	161.067	697.447	0	202.642	158.346
K02114	179.589	629.56	0	204.911	177.216	193.28	697.447	0	222.907	168.903
K02115	149.848	402.004	0	150.016	182.992	161.067	697.447	0	202.642	158.346
K02116	28.7501	548.225	0	102.745	119.796	32.2134	697.447	0	121.585	116.121
K02117	0	0	338.267	99.4705	187.548	0	0	448.994	101.321	158.346
K02118	0	0	346.158	84.7059	188.076	0	0	448.994	101.321	158.346
K02119	0	0	430.44	104.941	199.009	0	0	448.994	101.321	158.346
K02120	0	0	321.252	105.687	193.682	0	0	448.994	101.321	158.346
K02121	0	0	429.962	97.739	187.651	0	0	448.994	101.321	158.346
K02122	0	0	448.45	96.8566	177.784	0	0	448.994	101.321	158.346
K02123	0	0	440.795	100.849	155.428	0	0	448.994	101.321	158.346
K02124	0	0	462.869	101.487	190.937	0	0	538.793	121.585	190.016
K02125	0	251.614	0	40.2438	46.245	0	278.979	0	40.5285	42.2257
K02128	0	122.464	0	15.6952	21.144	0	139.489	0	20.2642	21.1129
K02133	0	401.234	0	101.094	78.7531	0	697.447	0	101.321	105.564
K02160	160.492	639.435	0	195.731	185.343	161.067	697.447	0	202.642	158.346
K02167	31.813	0	0	21.872	12.7948	32.2134	0	0	20.2642	10.5564
K02171	124.686	0	0	69.6082	44.7454	128.854	0	0	81.057	42.2257
K02188	150.597	0	423.317	203.122	255.246	161.067	0	448.994	202.642	211.129
K02189	183.737	0	448.081	218.898	262.46	193.28	0	448.994	222.907	221.685
K02191	143.744	0	429.646	183.824	238.467	161.067	0	448.994	202.642	211.129
K02194	0	133.279	0	20.5211	26.0558	0	139.489	0	20.2642	21.1129
K02195	0	649.017	0	90.9214	120.844	0	697.447	0	101.321	105.564
K02196	0	485.44	0	69.0822	88.4728	0	557.958	0	81.057	84.4514
K02197	0	685.613	0	91.2829	115.76	0	697.447	0	101.321	105.564
K02198	0	667.547	0	98.1994	124.881	0	697.447	0	101.321	105.564
K02199	0	1183.52	0	173.227	215.618	0	1255.4	0	182.378	190.016
K02200	57.2867	127.523	0	50.1209	66.9083	64.4268	139.489	0	60.7927	42.2257
K02201	0	0	343.163	83.8213	145.667	0	0	359.195	81.057	126.677
K02204	87.1962	659.634	0	151.292	158.073	96.6401	697.447	0	162.114	137.234
K02217	0	0	442.407	97.2341	177.012	0	0	448.994	101.321	158.346
K02221	277.583	514.549	0	251.688	204.892	354.347	557.958	0	303.964	200.572
K02224	158.891	0	445.114	201.656	253.396	161.067	0	448.994	202.642	211.129
K02227	150.345	0	429.01	194.578	244.481	161.067	0	448.994	202.642	211.129
K02229	62.3994	0	0	38.7978	23.444	64.4268	0	0	40.5285	21.1129
K02230	158.597	0	0	100.771	49.8648	161.067	0	0	101.321	52.7821
K02231	157.982	0	0	107.45	67.9927	161.067	0	0	101.321	52.7821
K02232	158.524	0	442.951	197.844	252.94	161.067	0	448.994	202.642	211.129
K02233	142.91	0	440.821	179.821	235.72	161.067	0	448.994	202.642	211.129
K02234	647.243	0	0	404.914	257.236	676.481	0	0	425.549	221.685
K02237	121.58	0	0	78.3694	50.2631	128.854	0	0	81.057	42.2257
K02238	147.602	0	0	93.5539	59.3613	161.067	0	0	101.321	52.7821
K02241	156.998	0	0	98.7814	57.3603	161.067	0	0	101.321	52.7821
K02242	149.065	128.501	0	120.009	92.4933	161.067	139.489	0	121.585	73.895
K02256	0	269.451	0	59.4862	53.7442	0	418.468	0	60.7927	63.3386
K02257	154.591	657.383	816.447	368.202	561.961	161.067	697.447	897.989	405.285	475.039
K02258	0	656.126	0	99.6338	124.947	0	697.447	0	101.321	105.564
K02259	152.868	667.081	461.566	278.917	365.168	161.067	697.447	448.994	303.964	316.693
K02274	269.56	540.483	0	272.377	214.534	289.92	697.447	0	283.699	200.572
K02275	287.711	792.8	0	302.616	265.927	289.92	836.937	0	303.964	221.685
K02276	281.097	760.182	0	291.386	251.08	289.92	836.937	0	303.964	221.685
K02277	0	125.174	0	24.3058	31.0969	0	139.489	0	20.2642	21.1129
K02284	248.417	0	0	155.493	102.817	257.707	0	0	162.114	84.4514
K02285	238.509	0	0	156.038	77.172	257.707	0	0	162.114	84.4514
K02286	243.6	0	0	153.409	98.8999	257.707	0	0	162.114	84.4514
K02287	59.5794	0	0	39.2322	24.334	64.4268	0	0	40.5285	21.1129
K02288	153.052	0	0	96.3942	58.9873	161.067	0	0	101.321	52.7821
K02289	186.763	0	0	118.898	74.1311	225.494	0	0	141.85	73.895
K02290	246.062	0	0	155.219	107.404	257.707	0	0	162.114	84.4514
K02291	148.658	127.324	0	112.784	85.6425	161.067	139.489	0	121.585	73.895
K02292	157.277	0	0	99.4759	62.3606	161.067	0	0	101.321	52.7821
K02293	147.197	0	0	94.1642	60.8967	161.067	0	0	101.321	52.7821
K02294	149.457	0	0	95.7609	60.5541	161.067	0	0	101.321	52.7821
K02303	352.667	0	434.55	312.202	325.743	354.347	0	448.994	324.228	274.467
K02313	147.674	671.282	0	184.634	174.523	161.067	697.447	0	202.642	158.346
K02314	210.528	740.757	0	249.717	214.11	225.494	697.447	0	243.171	179.459
K02316	219.167	1040.2	0	279.145	248.085	225.494	697.447	0	243.171	179.459
K02319	0	0	437.445	101.016	192.029	0	0	448.994	101.321	158.346
K02322	0	0	347.394	76.4261	150.418	0	0	359.195	81.057	126.677
K02323	0	0	444.209	101.343	189.621	0	0	448.994	101.321	158.346
K02335	150.464	668.507	0	194.109	190.071	161.067	697.447	0	202.642	158.346
K02337	155.423	677.853	0	190.783	181.285	161.067	697.447	0	202.642	158.346
K02338	180.295	654.802	0	215.371	196.278	193.28	697.447	0	222.907	168.903
K02340	212.36	527.727	0	211.274	179.665	225.494	557.958	0	222.907	158.346
K02341	33.3225	0	0	19.8728	11.7772	32.2134	0	0	20.2642	10.5564
K02342	29.7117	789.009	0	135.724	160.014	32.2134	836.937	0	141.85	137.234
K02343	218.067	661.596	0	234.913	213.294	225.494	697.447	0	243.171	179.459
K02346	27.9246	0	0	18.1992	11.4093	32.2134	0	0	20.2642	10.5564
K02348	31.9821	0	0	18.0849	10.7051	32.2134	0	0	20.2642	10.5564
K02355	339.023	647.176	0	312.49	257.854	354.347	697.447	0	324.228	221.685
K02356	155.97	636.273	0	193.251	186.836	161.067	697.447	0	202.642	158.346
K02357	276.236	646.141	0	276.041	240.895	161.067	697.447	0	202.642	158.346
K02358	149.029	650.884	0	198.618	179.516	161.067	697.447	0	202.642	158.346
K02372	151.009	656.399	0	200.618	192.653	161.067	697.447	0	202.642	158.346
K02377	144.697	403.099	79.8909	171.511	170.368	161.067	418.468	89.7989	182.378	147.79
K02379	31.6769	524.9	0	100.7	118.305	32.2134	557.958	0	101.321	95.0079
K02424	31.2226	0	0	20.6837	13.069	32.2134	0	0	20.2642	10.5564
K02426	149.966	129.574	0	109.849	85.0408	161.067	139.489	0	121.585	73.895
K02428	161.891	666.312	0	197.329	191.815	161.067	697.447	0	202.642	158.346
K02431	0	128.168	0	19.6695	27.0375	0	139.489	0	20.2642	21.1129
K02433	272.815	658.798	439.853	357.224	407.935	289.92	697.447	448.994	385.021	358.919
K02434	154.636	664.618	440.529	295.868	373.479	161.067	697.447	448.994	303.964	316.693
K02435	151.782	615.827	0	196.098	190.144	161.067	697.447	0	202.642	158.346
K02437	144.613	544.367	0	179.91	159.847	161.067	557.958	0	182.378	137.234
K02469	211.675	672.627	0	216.285	187.239	225.494	697.447	0	243.171	179.459
K02470	154.404	140.1	0	116.245	84.2903	161.067	139.489	0	121.585	73.895
K02471	279.458	0	0	179.725	115.375	289.92	0	0	182.378	95.0079
K02474	31.9844	0	0	20.7833	12.8155	32.2134	0	0	20.2642	10.5564
K02482	3078.67	0	0	2002.52	1265.28	3317.98	0	0	2087.22	1087.31
K02483	2428.32	516.119	0	1648.66	1088.18	2609.28	557.958	0	1722.46	939.522
K02484	278.059	0	0	181.11	114.459	289.92	0	0	182.378	95.0079
K02488	869.474	0	0	564.46	362.768	966.401	0	0	607.927	316.693
K02492	147.86	0	876.979	297.369	437.203	161.067	0	897.989	303.964	369.475
K02493	156.134	138.994	0	141.854	138.822	161.067	418.468	0	162.114	116.121
K02495	306.954	0	0	194.374	124.807	322.134	0	0	202.642	105.564
K02500	148.843	676.605	428.517	284.647	362.132	161.067	697.447	448.994	303.964	316.693
K02501	149.092	504.425	423.517	261.455	329.414	161.067	557.958	448.994	283.699	295.58
K02502	152.293	0	0	97.0425	65.1779	161.067	0	0	101.321	52.7821
K02503	178.675	655.192	831.297	397.749	562.841	193.28	697.447	897.989	425.549	485.596
K02510	30.825	256.179	0	58.0322	58.296	32.2134	278.979	0	60.7927	52.7821
K02518	148.553	600.069	0	194.31	181.913	161.067	697.447	0	202.642	158.346
K02519	153.273	664.26	0	195.287	188.271	161.067	697.447	0	202.642	158.346
K02520	350.261	686.459	0	346.622	250.652	322.134	697.447	0	303.964	211.129
K02523	0	520.378	0	79.6882	100.038	0	557.958	0	81.057	84.4514
K02527	0	800.273	0	116.706	168.156	0	836.937	0	121.585	126.677
K02528	151.481	388.033	0	156.341	141.045	161.067	418.468	0	162.114	116.121
K02529	29.1922	0	0	20.05	12.6844	32.2134	0	0	20.2642	10.5564
K02533	145.367	0	0	89.6271	55.8903	161.067	0	0	101.321	52.7821
K02535	148.311	537.865	0	171.502	155.593	161.067	557.958	0	182.378	137.234
K02536	160.407	656.933	80.7666	210.562	217.703	161.067	697.447	89.7989	222.907	190.016
K02548	0	0	352.925	82.5513	152.387	0	0	359.195	81.057	126.677
K02549	121.49	0	0	74.8343	49.7299	128.854	0	0	81.057	42.2257
K02551	157.032	0	0	101.938	66.3927	161.067	0	0	101.321	52.7821
K02552	185.58	0	0	116.981	73.7439	193.28	0	0	121.585	63.3386
K02553	33.1969	0	0	19.8138	12.3392	32.2134	0	0	20.2642	10.5564
K02557	0	135.439	0	19.2194	25.4632	0	139.489	0	20.2642	21.1129
K02563	144.529	128	0	114.754	81.572	161.067	139.489	0	121.585	73.895
K02564	95.8863	0	0	61.5656	39.2076	96.6401	0	0	60.7927	31.6693
K02575	188.961	0	0	119.16	78.0038	193.28	0	0	121.585	63.3386
K02585	64.2028	0	0	38.4722	23.0196	64.4268	0	0	40.5285	21.1129
K02586	56.1728	0	0	37.3927	24.0304	64.4268	0	0	40.5285	21.1129
K02587	93.2075	0	0	58.889	35.6021	96.6401	0	0	60.7927	31.6693
K02588	126.009	0	0	81.9006	53.8967	128.854	0	0	81.057	42.2257
K02591	65.3342	0	0	40.6285	25.5651	64.4268	0	0	40.5285	21.1129
K02592	89.5794	0	0	54.8775	34.3717	96.6401	0	0	60.7927	31.6693
K02593	52.8361	0	0	34.6068	21.6796	64.4268	0	0	40.5285	21.1129
K02594	58.8193	0	0	37.7956	23.9128	64.4268	0	0	40.5285	21.1129
K02595	62.3941	0	0	35.1609	23.1098	64.4268	0	0	40.5285	21.1129
K02596	62.8225	0	0	36.3392	22.6329	64.4268	0	0	40.5285	21.1129
K02597	54.9695	0	0	33.5977	20.6286	64.4268	0	0	40.5285	21.1129
K02600	188.77	873.019	405.831	350.081	401.024	193.28	697.447	448.994	324.228	327.249
K02601	156.166	679.015	0	200.282	198.082	161.067	697.447	0	202.642	158.346
K02619	33.0931	0	0	21.4502	12.8033	32.2134	0	0	20.2642	10.5564
K02626	0	0	422.961	96.7405	183.039	0	0	448.994	101.321	158.346
K02634	149.773	0	0	97.6864	65.145	161.067	0	0	101.321	52.7821
K02635	154.574	0	0	98.4924	57.395	161.067	0	0	101.321	52.7821
K02636	417.176	0	0	262.446	161.123	450.987	0	0	283.699	147.79
K02637	147.245	0	0	95.5925	59.6858	161.067	0	0	101.321	52.7821
K02638	153.451	0	0	99.868	60.9166	161.067	0	0	101.321	52.7821
K02639	753.124	0	0	503.133	323.355	805.335	0	0	506.606	263.911
K02640	57.0779	0	0	34.7761	21.9358	32.2134	0	0	20.2642	10.5564
K02641	217.16	0	0	140.115	89.4188	225.494	0	0	141.85	73.895
K02642	149.223	0	0	86.741	52.9588	161.067	0	0	101.321	52.7821
K02643	134.256	0	0	85.7151	54.5493	161.067	0	0	101.321	52.7821
K02650	203.699	0	0	141.481	91.3854	225.494	0	0	141.85	73.895
K02652	185.499	0	0	122.123	78.6546	193.28	0	0	121.585	63.3386
K02653	124.996	0	0	79.7186	51.467	128.854	0	0	81.057	42.2257
K02654	149.335	380.921	0	158.737	137.716	161.067	418.468	0	162.114	116.121
K02657	152.358	0	0	95.6869	61.3229	161.067	0	0	101.321	52.7821
K02658	382.767	0	0	256.305	158.904	418.774	0	0	263.435	137.234
K02660	184.653	0	0	117.584	73.9058	193.28	0	0	121.585	63.3386
K02662	156.99	408.664	0	159.146	140.6	161.067	418.468	0	162.114	116.121
K02663	158.826	408.664	0	156.069	135.152	161.067	418.468	0	162.114	116.121
K02664	151.962	0	0	95.4343	60.9595	161.067	0	0	101.321	52.7821
K02669	299.464	132.634	0	256.699	205.225	322.134	418.468	0	263.435	168.903
K02672	60.4518	398.529	0	99.5642	101.141	64.4268	418.468	0	101.321	84.4514
K02674	0	536.95	0	78.2603	99.605	0	418.468	0	60.7927	63.3386
K02683	0	0	444.381	100.204	185.634	0	0	448.994	101.321	158.346
K02687	151.463	0	0	99.8458	62.9635	161.067	0	0	101.321	52.7821
K02689	159.894	0	0	101.261	62.9447	161.067	0	0	101.321	52.7821
K02690	181.406	0	0	115.866	72.5491	257.707	0	0	162.114	84.4514
K02691	148.583	0	0	86.4954	56.7172	161.067	0	0	101.321	52.7821
K02692	152.871	0	0	104.162	62.7955	161.067	0	0	101.321	52.7821
K02693	188.411	0	0	107.891	68.8695	193.28	0	0	121.585	63.3386
K02694	155.362	0	0	104.506	63.7179	161.067	0	0	101.321	52.7821
K02696	76.3568	0	0	54.7814	35.251	128.854	0	0	81.057	42.2257
K02697	102.898	0	0	68.8513	47.4313	193.28	0	0	121.585	63.3386
K02698	266.953	0	0	172.363	112.592	289.92	0	0	182.378	95.0079
K02699	178.847	0	0	114.382	72.8351	193.28	0	0	121.585	63.3386
K02700	144.311	0	0	86.3473	47.8068	161.067	0	0	101.321	52.7821
K02702	48.9106	0	0	26.666	17.7407	64.4268	0	0	40.5285	21.1129
K02703	727.983	0	0	486.076	267.408	676.481	0	0	425.549	221.685
K02704	152.504	0	0	97.3726	63.0228	161.067	0	0	101.321	52.7821
K02705	283.027	0	0	179.67	114.462	289.92	0	0	182.378	95.0079
K02706	301.694	0	0	202.24	131.685	354.347	0	0	222.907	116.121
K02707	180.276	0	0	123.267	78.0446	193.28	0	0	121.585	63.3386
K02708	114.742	0	0	80.9397	47.6352	128.854	0	0	81.057	42.2257
K02709	111.596	0	0	81.6066	50.3583	128.854	0	0	81.057	42.2257
K02710	81.0532	0	0	52.5147	31.9758	128.854	0	0	81.057	42.2257
K02711	81.2178	0	0	57.4333	32.0068	96.6401	0	0	60.7927	31.6693
K02712	146.147	0	0	95.9599	61.2719	161.067	0	0	101.321	52.7821
K02713	102.941	0	0	67.3111	40.7538	32.2134	0	0	20.2642	10.5564
K02714	51.6201	0	0	36.3452	23.0994	161.067	0	0	101.321	52.7821
K02715	54.9334	0	0	39.7222	23.789	161.067	0	0	101.321	52.7821
K02716	151.974	0	0	96.7768	63.1122	161.067	0	0	101.321	52.7821
K02717	166.302	0	0	96.8999	61.2141	161.067	0	0	101.321	52.7821
K02718	78.8485	0	0	45.2964	30.8697	161.067	0	0	101.321	52.7821
K02719	246.484	0	0	153.925	94.5267	257.707	0	0	162.114	84.4514
K02720	212.746	0	0	137.626	87.1014	225.494	0	0	141.85	73.895
K02722	27.6926	0	0	16.0666	8.74003	96.6401	0	0	60.7927	31.6693
K02723	124.283	0	0	88.6947	46.9926	161.067	0	0	101.321	52.7821
K02724	143.786	0	0	79.4208	50.2516	161.067	0	0	101.321	52.7821
K02784	62.9386	0	0	37.8945	24.7533	64.4268	0	0	40.5285	21.1129
K02823	0	0	180.151	16.5681	68.1719	0	0	179.598	40.5285	63.3386
K02824	28.6882	0	0	17.7607	11.953	32.2134	0	0	20.2642	10.5564
K02825	158.344	0	0	96.2241	62.5421	161.067	0	0	101.321	52.7821
K02834	176.542	735.741	0	199.296	180.802	161.067	697.447	0	202.642	158.346
K02835	152.948	666.377	0	198.595	189.515	161.067	697.447	0	202.642	158.346
K02836	162.355	655.845	0	195.634	186.068	161.067	697.447	0	202.642	158.346
K02837	152.285	0	0	98.5274	51.6349	161.067	0	0	101.321	52.7821
K02838	158.677	674.985	0	193.53	187.868	161.067	697.447	0	202.642	158.346
K02844	31.9882	0	0	19.1566	12.2504	32.2134	0	0	20.2642	10.5564
K02851	224.559	0	0	142.34	97.1282	225.494	0	0	141.85	73.895
K02858	124.892	0	0	82.8464	51.7565	128.854	0	0	81.057	42.2257
K02860	145.982	129.911	0	109.516	83.6129	161.067	139.489	0	121.585	73.895
K02863	156.827	666.437	428.508	298.536	375.164	161.067	697.447	448.994	303.964	316.693
K02864	153.941	633.833	0	200.637	189.503	161.067	697.447	0	202.642	158.346
K02866	0	0	434.014	97.7329	182.025	0	0	448.994	101.321	158.346
K02867	148.65	669.745	433.324	279.121	351.199	161.067	697.447	448.994	303.964	316.693
K02869	0	0	383.162	85.7761	184.121	0	0	448.994	101.321	158.346
K02871	144.399	692.219	0	186.796	172.471	161.067	697.447	0	202.642	158.346
K02874	155.374	631.417	0	203.451	192.284	161.067	697.447	0	202.642	158.346
K02876	153.26	826.124	0	191.773	182.767	161.067	697.447	0	202.642	158.346
K02877	0	0	437.496	100.208	179.766	0	0	448.994	101.321	158.346
K02878	137.668	643.154	0	187.322	176.544	161.067	697.447	0	202.642	158.346
K02879	141.255	647.286	0	203.746	199.337	161.067	697.447	0	202.642	158.346
K02881	155.869	663.71	416.671	289.537	367.431	161.067	697.447	448.994	303.964	316.693
K02883	0	0	426.551	102.273	203.479	0	0	448.994	101.321	158.346
K02884	147.434	646.216	0	197.991	182.828	161.067	697.447	0	202.642	158.346
K02885	0	0	428.571	92.7627	183.952	0	0	448.994	101.321	158.346
K02886	159.795	664.612	0	194.027	191.898	161.067	697.447	0	202.642	158.346
K02887	149.327	615.895	0	178.642	179.56	161.067	697.447	0	202.642	158.346
K02888	148.691	639.785	0	198.778	185.346	161.067	697.447	0	202.642	158.346
K02889	0	0	376.143	72.7965	146.894	0	0	359.195	81.057	126.677
K02890	136.212	643.529	0	207.37	187.698	161.067	697.447	0	202.642	158.346
K02892	149.521	663.732	0	181.387	181.714	161.067	697.447	0	202.642	158.346
K02895	146.339	645.465	0	204.039	200	161.067	697.447	0	202.642	158.346
K02896	0	0	407.398	101.531	184.683	0	0	448.994	101.321	158.346
K02897	123.684	664.085	0	171.584	167.097	128.854	697.447	0	182.378	147.79
K02899	152.768	635.675	0	191.581	184.592	161.067	697.447	0	202.642	158.346
K02902	176.832	635.207	0	193.834	180.428	161.067	697.447	0	202.642	158.346
K02904	136.444	498.104	0	180.997	155.548	161.067	557.958	0	182.378	137.234
K02906	146.381	644.14	85.556	232.142	236.06	161.067	697.447	89.7989	222.907	190.016
K02908	0	0	432.546	91.5802	188.886	0	0	448.994	101.321	158.346
K02909	143.231	634.235	0	183.246	170.442	161.067	697.447	0	202.642	158.346
K02910	0	0	448.527	93.428	196.567	0	0	448.994	101.321	158.346
K02911	146.151	661.122	0	178.143	163.471	161.067	697.447	0	202.642	158.346
K02912	0	0	440.018	111.901	208.235	0	0	448.994	101.321	158.346
K02913	91.6943	579.731	0	144.229	153.925	64.4268	697.447	0	141.85	126.677
K02914	85.2579	671.368	0	168.052	167.644	96.6401	697.447	0	162.114	137.234
K02916	108.369	588.396	0	149.32	152.521	161.067	697.447	0	202.642	158.346
K02919	0	302.827	0	46.8616	61.7327	0	418.468	0	60.7927	63.3386
K02921	0	0	419.065	86.0945	162.516	0	0	448.994	101.321	158.346
K02924	0	0	206.001	0	0	0	0	448.994	101.321	158.346
K02926	144.304	664.392	0	172.506	166.341	161.067	697.447	0	202.642	158.346
K02929	0	0	412.967	100.679	196.496	0	0	448.994	101.321	158.346
K02930	0	0	432.029	100.475	186.699	0	0	448.994	101.321	158.346
K02931	154.303	665.449	329.947	298.467	387.236	161.067	697.447	448.994	303.964	316.693
K02933	155.133	657.951	0	197.162	201.479	161.067	697.447	0	202.642	158.346
K02935	217.127	666.033	0	230.808	213.08	225.494	697.447	0	243.171	179.459
K02936	0	0	340.465	60.658	135.015	0	0	448.994	101.321	158.346
K02939	151.717	659.028	0	197.382	196.605	161.067	697.447	0	202.642	158.346
K02945	314.307	652.091	0	308.606	267.705	322.134	697.447	0	303.964	211.129
K02946	160.67	647.426	0	189.817	180.471	161.067	697.447	0	202.642	158.346
K02948	148.922	647.15	421.37	281.413	377.001	161.067	697.447	448.994	303.964	316.693
K02950	151.741	649.608	389.571	244.738	332.79	161.067	697.447	448.994	303.964	316.693
K02952	157.812	633.174	81.6867	224.394	229.437	161.067	697.447	359.195	283.699	285.024
K02954	138.256	668.727	0	184.498	179.575	161.067	697.447	0	202.642	158.346
K02956	150.211	614.307	0	190.25	181.123	161.067	697.447	0	202.642	158.346
K02959	151.008	876.8	0	190.164	183.74	161.067	697.447	0	202.642	158.346
K02961	152.213	609.303	0	199.27	187.517	161.067	697.447	0	202.642	158.346
K02962	0	0	419.741	110.332	191.58	0	0	448.994	101.321	158.346
K02963	138.43	506.262	0	154.634	146.333	161.067	557.958	0	182.378	137.234
K02965	146.847	637.111	0	194.811	192.851	161.067	697.447	0	202.642	158.346
K02966	0	0	420.152	97.9601	187.097	0	0	448.994	101.321	158.346
K02967	153.673	783.038	0	200.742	200.167	161.067	836.937	0	222.907	179.459
K02968	99.7837	660.056	0	170.092	171.165	161.067	697.447	0	202.642	158.346
K02970	295.948	372.632	0	251.28	203.067	322.134	278.979	0	243.171	147.79
K02975	0	0	434.755	103.729	194.218	0	0	448.994	101.321	158.346
K02976	0	0	440.107	102.325	181.243	0	0	448.994	101.321	158.346
K02978	0	0	402.322	90.3741	168.479	0	0	448.994	101.321	158.346
K02979	0	0	402.521	87.8098	174.002	0	0	448.994	101.321	158.346
K02982	149.587	644.892	421.642	277.819	361.044	161.067	697.447	448.994	303.964	316.693
K02984	0	0	428.739	94.9652	184.418	0	0	448.994	101.321	158.346
K02986	145.366	667.823	179.388	234.717	260.146	161.067	697.447	179.598	243.171	221.685
K02987	0	0	431.881	95.4466	183.992	0	0	448.994	101.321	158.346
K02988	151.723	659.785	91.9984	252.734	297.224	161.067	697.447	269.397	263.435	253.354
K02990	149.608	753.825	0	183.302	171.416	161.067	697.447	0	202.642	158.346
K02991	0	0	421.54	97.8749	191.611	0	0	448.994	101.321	158.346
K02992	141.481	661.124	175.063	230.773	255.534	161.067	697.447	179.598	243.171	221.685
K02994	144.621	617.921	0	181.454	170.36	161.067	697.447	0	202.642	158.346
K02995	0	0	439.14	98.416	179.253	0	0	448.994	101.321	158.346
K02996	154.168	647.935	424.261	277.332	362.673	161.067	697.447	448.994	303.964	316.693
K03014	0	0	419.589	92.2175	181.745	0	0	448.994	101.321	158.346
K03040	147.272	810.953	0	249.899	220.303	161.067	836.937	0	222.907	179.459
K03041	0	0	427.44	77.0582	148.503	0	0	448.994	101.321	158.346
K03043	155.847	678.205	0	195.572	185.598	161.067	697.447	0	202.642	158.346
K03046	309.421	746.309	0	314.467	253.002	322.134	697.447	0	303.964	211.129
K03047	0	0	440.487	103.926	191.062	0	0	448.994	101.321	158.346
K03049	0	0	431.083	95.911	188.566	0	0	448.994	101.321	158.346
K03050	0	0	419.709	92.5146	166.564	0	0	448.994	101.321	158.346
K03051	0	0	429.278	89.5321	186.814	0	0	448.994	101.321	158.346
K03053	0	0	434.266	101.848	188.782	0	0	448.994	101.321	158.346
K03057	0	0	420.809	88.0484	174.896	0	0	448.994	101.321	158.346
K03058	0	0	431.147	102.63	176.814	0	0	448.994	101.321	158.346
K03059	0	0	404.209	79.1146	170.477	0	0	448.994	101.321	158.346
K03060	120.245	648.035	0	166.754	169.045	128.854	697.447	0	182.378	147.79
K03070	153.121	844.436	0	197.339	188.821	161.067	697.447	0	202.642	158.346
K03071	0	526.509	0	74.7803	100.745	0	557.958	0	81.057	84.4514
K03072	153.317	523.325	0	178.225	165.257	161.067	557.958	0	182.378	137.234
K03073	157.64	438.237	0	135.8	106.12	161.067	418.468	0	162.114	116.121
K03074	118.203	536.15	0	156.191	149.854	128.854	557.958	0	162.114	126.677
K03075	149.397	637.817	0	200.678	187.253	161.067	697.447	0	202.642	158.346
K03076	151.999	671.665	442.932	286.436	365.382	161.067	697.447	448.994	303.964	316.693
K03086	149.125	661.697	0	186.944	180.413	161.067	697.447	0	202.642	158.346
K03087	112.929	0	0	70.3551	45.3434	128.854	0	0	81.057	42.2257
K03088	505.576	124.53	0	351.795	233.751	515.414	139.489	0	344.492	190.016
K03089	0	668.275	0	99.4275	130.733	0	697.447	0	101.321	105.564
K03090	280.177	0	0	181.174	114.814	289.92	0	0	182.378	95.0079
K03100	419.205	663.301	0	384.23	319.936	450.987	697.447	0	385.021	253.354
K03101	186.306	662.561	0	208.826	196.113	193.28	697.447	0	222.907	168.903
K03105	0	0	414.34	93.2536	181.485	0	0	448.994	101.321	158.346
K03106	151.696	650.599	437.657	298.419	342.518	161.067	697.447	448.994	303.964	316.693
K03110	150.802	518.16	338.487	253.276	303.257	161.067	557.958	359.195	263.435	263.911
K03111	419.082	665.413	0	357.264	270.431	418.774	697.447	0	364.756	242.798
K03113	118.1	0	401.717	165.974	229.772	128.854	0	448.994	182.378	200.572
K03116	247.524	654.716	166.072	291.158	282.51	289.92	697.447	179.598	324.228	263.911
K03117	115.822	390.693	0	118.604	107.131	96.6401	418.468	0	121.585	95.0079
K03118	154.955	649.776	441.792	306.421	375.785	161.067	697.447	448.994	303.964	316.693
K03120	0	0	1244.41	278.339	527.748	0	0	1257.18	283.699	443.37
K03124	0	0	4191.61	953.033	1793.51	0	0	4400.14	992.948	1551.79
K03130	303.45	0	0	179.547	116.785	289.92	0	0	182.378	95.0079
K03136	0	0	379.103	83.7799	161.556	0	0	359.195	81.057	126.677
K03147	158.146	0	434.798	201.543	254.84	161.067	0	448.994	202.642	211.129
K03149	154.41	524.042	0	176.281	163.963	161.067	557.958	0	182.378	137.234
K03153	154.899	0	0	99.6174	63.4731	161.067	0	0	101.321	52.7821
K03154	132.077	517.448	0	147.068	145.672	161.067	557.958	0	182.378	137.234
K03163	0	0	447.342	96.9157	179.573	0	0	448.994	101.321	158.346
K03166	0	0	427.58	97.3108	158.924	0	0	448.994	101.321	158.346
K03167	0	0	442.827	94.724	183.352	0	0	448.994	101.321	158.346
K03168	304.548	676.132	0	292.774	237.685	322.134	697.447	0	303.964	211.129
K03177	148.039	264.918	0	134.464	112.096	161.067	278.979	0	141.85	95.0079
K03179	143.406	674.629	0	191.683	180.431	161.067	697.447	0	202.642	158.346
K03181	156.987	0	0	102.718	65.3336	161.067	0	0	101.321	52.7821
K03182	153.362	0	358.726	198.266	250.422	161.067	0	448.994	202.642	211.129
K03183	0	389.627	0	56.8713	69.234	0	418.468	0	60.7927	63.3386
K03185	151.707	0	0	101.473	64.4859	161.067	0	0	101.321	52.7821
K03186	141.388	0	428.765	180.71	236.703	161.067	0	448.994	202.642	211.129
K03187	153.187	0	259.063	159.631	171.941	161.067	0	269.397	162.114	147.79
K03188	182.524	0	259.516	183.211	186.342	193.28	0	269.397	182.378	158.346
K03189	188.311	0	248.937	166.224	170.84	193.28	0	269.397	182.378	158.346
K03190	175.538	0	267.803	169.563	184.754	193.28	0	269.397	182.378	158.346
K03192	218.76	0	0	140.525	88.6918	225.494	0	0	141.85	73.895
K03205	186.196	0	0	78.4741	63.7409	193.28	0	0	121.585	63.3386
K03206	88.2248	0	0	58.1137	34.3275	96.6401	0	0	60.7927	31.6693
K03208	203.687	0	0	129.154	81.7909	225.494	0	0	141.85	73.895
K03210	0	629.19	0	93.6785	119.695	0	697.447	0	101.321	105.564
K03215	149.006	0	0	99.1352	63.4347	161.067	0	0	101.321	52.7821
K03216	147.582	651.835	0	200.402	186.284	161.067	697.447	0	202.642	158.346
K03217	159.815	668.353	0	192.579	181.638	161.067	697.447	0	202.642	158.346
K03218	149.981	134.03	0	109.188	82.5318	161.067	139.489	0	121.585	73.895
K03231	0	0	168.829	62.6589	147.281	0	0	359.195	81.057	126.677
K03236	0	0	695.799	165.159	297.062	0	0	718.391	162.114	253.354
K03237	0	0	437.015	95.5262	186.146	0	0	448.994	101.321	158.346
K03238	0	0	425.308	91.647	174.832	0	0	448.994	101.321	158.346
K03242	0	0	445.612	104.772	186.388	0	0	448.994	101.321	158.346
K03243	0	0	433.196	118.847	193.283	0	0	448.994	101.321	158.346
K03263	0	0	439.564	95.7465	179.267	0	0	448.994	101.321	158.346
K03264	0	0	450.684	101.666	189.918	0	0	448.994	101.321	158.346
K03265	0	0	698.009	151.044	292.649	0	0	718.391	162.114	253.354
K03269	0	134.865	0	14.7865	21.1995	0	139.489	0	20.2642	21.1129
K03270	27.2702	0	87.1935	36.1485	50.2406	32.2134	0	89.7989	40.5285	42.2257
K03271	0	269.432	343.49	119.808	199.555	0	278.979	359.195	121.585	168.903
K03273	90.8682	0	257.365	114.609	147.432	96.6401	0	269.397	121.585	126.677
K03274	0	127.221	0	19.6789	25.6455	0	139.489	0	20.2642	21.1129
K03281	269.845	0	0	173.195	110.364	289.92	0	0	182.378	95.0079
K03282	30.1893	0	0	20.2472	13.0103	32.2134	0	0	20.2642	10.5564
K03284	150.259	0	843.853	287.644	430.474	161.067	0	897.989	303.964	369.475
K03286	32.9286	0	0	21.8779	13.504	32.2134	0	0	20.2642	10.5564
K03287	211.207	0	0	135.899	86.2317	225.494	0	0	141.85	73.895
K03292	207.264	0	0	137.203	89.3115	225.494	0	0	141.85	73.895
K03296	181.233	0	0	118.429	75.2841	193.28	0	0	121.585	63.3386
K03297	28.3469	394.958	0	72.908	79.1207	32.2134	418.468	0	81.057	73.895
K03298	29.7857	0	0	19.7948	12.4743	32.2134	0	0	20.2642	10.5564
K03301	118.915	0	0	77.4766	49.3309	128.854	0	0	81.057	42.2257
K03303	32.3678	0	0	20.0261	12.7812	32.2134	0	0	20.2642	10.5564
K03306	61.4684	0	175.044	75.1932	98.1808	64.4268	0	179.598	81.057	84.4514
K03307	121.183	0	0	76.9652	48.6092	128.854	0	0	81.057	42.2257
K03308	0	0	88.8181	18.2286	36.7163	0	0	89.7989	20.2642	31.6693
K03310	90.0793	0	0	58.0173	36.8361	96.6401	0	0	60.7927	31.6693
K03312	87.984	0	0	56.3898	35.8499	96.6401	0	0	60.7927	31.6693
K03313	0	528.303	0	81.4379	106.076	0	557.958	0	81.057	84.4514
K03316	279.361	0	0	172.69	108.732	289.92	0	0	182.378	95.0079
K03317	60.855	0	0	39.0204	23.8048	64.4268	0	0	40.5285	21.1129
K03320	363.343	1796.97	945.08	716.794	980.741	386.561	1813.36	897.989	709.249	717.837
K03321	418.142	401.653	0	325.72	239.929	450.987	418.468	0	344.492	211.129
K03322	28.4526	0	0	17.8833	11.263	32.2134	0	0	20.2642	10.5564
K03325	151.871	0	0	92.0387	58.623	161.067	0	0	101.321	52.7821
K03327	123.382	536.155	0	158.237	149.317	128.854	557.958	0	162.114	126.677
K03328	125.215	0	0	73.326	36.6596	96.6401	0	0	60.7927	31.6693
K03330	0	0	356.253	72.2122	144.938	0	0	359.195	81.057	126.677
K03331	0	533.801	0	81.4717	101.791	0	557.958	0	81.057	84.4514
K03333	62.1781	0	0	39.1009	24.2497	64.4268	0	0	40.5285	21.1129
K03335	31.8923	133.489	0	40.3625	36.4036	32.2134	139.489	0	40.5285	31.6693
K03336	0	137.541	0	17.9236	23.7167	0	139.489	0	20.2642	21.1129
K03337	0	137.032	0	18.7705	23.0474	0	139.489	0	20.2642	21.1129
K03338	0	132.247	0	19.3758	25.8772	0	139.489	0	20.2642	21.1129
K03361	62.4867	0	0	40.4067	13.0535	161.067	0	0	101.321	52.7821
K03365	121.559	0	0	81.6572	52.2369	128.854	0	0	81.057	42.2257
K03367	299.983	0	0	196.494	128.442	289.92	0	0	182.378	95.0079
K03379	0	137.543	0	20.6992	26.0966	0	139.489	0	20.2642	21.1129
K03386	150.883	0	0	94.3588	61.2633	161.067	0	0	101.321	52.7821
K03389	66.4903	0	0	41.3147	25.0338	64.4268	0	0	40.5285	21.1129
K03390	109.013	0	0	68.5656	46.0683	128.854	0	0	81.057	42.2257
K03394	154.298	0	440.548	199.425	252.395	161.067	0	448.994	202.642	211.129
K03395	35.2779	0	0	25.0116	15.2787	32.2134	0	0	20.2642	10.5564
K03399	0	0	445.002	100.135	190.799	0	0	448.994	101.321	158.346
K03403	275.672	0	0	176.89	112.6	289.92	0	0	182.378	95.0079
K03404	164.458	0	0	100.69	64.847	161.067	0	0	101.321	52.7821
K03405	310.366	0	0	194.907	124.838	322.134	0	0	202.642	105.564
K03406	1043.76	0	178.159	709.369	495.603	1095.26	0	179.598	729.513	422.257
K03407	61.0289	0	0	38.1137	24.2433	64.4268	0	0	40.5285	21.1129
K03408	91.646	0	168.182	96.8073	115.849	96.6401	0	179.598	101.321	95.0079
K03410	60.157	0	180.988	75.3899	92.121	64.4268	0	179.598	81.057	84.4514
K03411	0	0	87.3899	20.5952	41.87	0	0	89.7989	20.2642	31.6693
K03412	298.781	0	173.637	236.733	199.978	322.134	0	179.598	243.171	168.903
K03413	400.454	0	83.6501	280.16	202.121	418.774	0	89.7989	283.699	168.903
K03417	0	538.49	0	78.1342	100.134	0	557.958	0	81.057	84.4514
K03424	154.026	656.84	438.034	289.014	371.249	161.067	697.447	448.994	303.964	316.693
K03427	551.475	0	0	347.551	227.137	579.841	0	0	364.756	190.016
K03428	155.305	0	0	103.584	68.6002	161.067	0	0	101.321	52.7821
K03431	154.276	655.219	0	181.651	163.951	161.067	697.447	0	202.642	158.346
K03432	0	0	858.777	196.323	368.826	0	0	897.989	202.642	316.693
K03433	0	0	416.267	95.6628	155.661	0	0	448.994	101.321	158.346
K03437	134.009	0	0	89.5715	53.7944	161.067	0	0	101.321	52.7821
K03438	160.709	703.546	0	201.044	186.935	161.067	697.447	0	202.642	158.346
K03439	143.536	271.627	0	131.015	109.16	161.067	278.979	0	141.85	95.0079
K03442	329.407	0	0	210.552	135.903	354.347	0	0	222.907	116.121
K03446	58.1322	0	0	38.9759	24.3416	64.4268	0	0	40.5285	21.1129
K03455	668.802	0	1753.69	826.984	1019.24	708.694	0	1795.98	851.098	865.627
K03457	0	396.358	0	60.7405	78.3966	0	418.468	0	60.7927	63.3386
K03464	29.5823	0	0	17.7537	10.6721	32.2134	0	0	20.2642	10.5564
K03465	128.832	669.559	355.553	253.652	321.493	128.854	697.447	359.195	263.435	274.467
K03466	90.2662	667.502	0	151.531	163.077	96.6401	697.447	0	162.114	137.234
K03469	151.879	655.199	0	200.677	192.825	161.067	697.447	0	202.642	158.346
K03470	111.998	667.184	258.9	221.345	258.89	128.854	697.447	269.397	243.171	242.798
K03474	153.891	658.06	0	193.023	182.341	161.067	697.447	0	202.642	158.346
K03478	34.2468	0	0	21.9518	13.6574	32.2134	0	0	20.2642	10.5564
K03495	156.117	652.945	0	199.297	189.246	161.067	697.447	0	202.642	158.346
K03496	879.106	667.75	0	656.11	488.963	934.188	697.447	0	688.984	411.701
K03497	357.124	668.437	786.27	508.614	612.866	386.561	697.447	808.19	526.87	517.265
K03498	214.722	1190.89	614.493	464.081	602.29	225.494	1255.4	628.592	466.078	485.596
K03499	243.425	1046.68	0	304.757	294.387	257.707	557.958	0	243.171	168.903
K03500	148.208	0	0	95.9887	60.7272	161.067	0	0	101.321	52.7821
K03501	145.59	650.411	0	187.853	180.775	161.067	697.447	0	202.642	158.346
K03502	90.0265	546.448	0	148.596	135.22	96.6401	697.447	0	162.114	137.234
K03503	113.395	651.322	0	174.201	175.005	128.854	697.447	0	182.378	147.79
K03517	150.341	526.425	529.109	278.182	372.966	161.067	557.958	538.793	303.964	327.249
K03518	0	135.354	0	20.3359	26.6554	0	139.489	0	20.2642	21.1129
K03520	0	138.268	0	19.946	25.5328	0	139.489	0	20.2642	21.1129
K03521	0	531.499	90.1639	92.7499	136.39	0	557.958	89.7989	101.321	116.121
K03522	0	533.275	84.6423	100.172	139.146	0	557.958	89.7989	101.321	116.121
K03523	147.933	656.572	0	203.92	189.957	161.067	697.447	0	202.642	158.346
K03524	128.381	0	435.312	183.767	234.417	128.854	0	448.994	182.378	200.572
K03525	160.392	655.67	0	193.886	185.428	161.067	697.447	0	202.642	158.346
K03526	155.089	642.459	0	193.251	184.204	161.067	697.447	0	202.642	158.346
K03527	149.646	666.824	0	198.793	187.669	161.067	697.447	0	202.642	158.346
K03529	149.625	670.305	269.311	269.812	331.919	161.067	697.447	359.195	283.699	285.024
K03530	440.305	129.118	0	285.046	194.828	450.987	139.489	0	303.964	168.903
K03531	184.22	667.184	0	221.184	203.023	193.28	697.447	0	222.907	168.903
K03536	147.24	676.062	0	200.214	191.808	161.067	697.447	0	202.642	158.346
K03538	0	0	426.568	94.1056	175.106	0	0	448.994	101.321	158.346
K03540	0	0	319.626	87.8978	158.275	0	0	448.994	101.321	158.346
K03543	32.1126	0	0	21.1963	13.5156	32.2134	0	0	20.2642	10.5564
K03544	147.147	794.062	0	191.794	185.441	161.067	697.447	0	202.642	158.346
K03545	151.342	653.337	0	198.09	188.119	161.067	697.447	0	202.642	158.346
K03546	210.413	0	175.177	173.014	160.62	225.494	0	179.598	182.378	137.234
K03547	182.323	0	509.885	234.354	291.533	193.28	0	538.793	243.171	253.354
K03550	160.735	0	0	99.9033	63.5539	161.067	0	0	101.321	52.7821
K03551	149.58	0	0	97.0176	61.5235	161.067	0	0	101.321	52.7821
K03552	0	0	425.143	99.9384	181.135	0	0	448.994	101.321	158.346
K03553	371.338	696.904	0	401.318	282.247	386.561	697.447	0	344.492	232.241
K03555	156.261	0	0	100.715	65.3813	161.067	0	0	101.321	52.7821
K03556	58.5555	0	0	37.8961	24.0138	64.4268	0	0	40.5285	21.1129
K03558	0	516.286	0	76.0827	98.2246	0	557.958	0	81.057	84.4514
K03559	398.206	657.225	0	357.188	290.403	418.774	697.447	0	364.756	242.798
K03560	0	521.297	0	77.5359	100.258	0	557.958	0	81.057	84.4514
K03561	372.73	673.326	0	334.47	272.999	386.561	697.447	0	344.492	232.241
K03562	0	671.921	0	98.604	124.669	0	697.447	0	101.321	105.564
K03564	557.661	409.936	427.983	523.447	497.809	579.841	418.468	448.994	526.87	411.701
K03565	32.4456	652.885	0	118.572	130.215	32.2134	697.447	0	121.585	116.121
K03566	0	127.431	0	20.9117	25.6587	0	139.489	0	20.2642	21.1129
K03568	369.757	503.855	436.597	405.169	432.096	386.561	557.958	448.994	425.549	369.475
K03569	214.697	658.447	0	236.82	210.09	225.494	697.447	0	243.171	179.459
K03570	155.389	685.915	0	199.913	186.444	161.067	697.447	0	202.642	158.346
K03571	153.001	529.252	0	185.006	166.075	161.067	557.958	0	182.378	137.234
K03572	146.479	0	0	92.0792	59.1573	161.067	0	0	101.321	52.7821
K03574	429.716	129.031	0	294.019	193.396	483.201	139.489	0	324.228	179.459
K03575	155.908	668.801	0	183.78	180.605	128.854	697.447	0	182.378	147.79
K03576	30.8867	0	0	20.0175	10.4889	32.2134	0	0	20.2642	10.5564
K03580	63.491	0	0	39.3195	24.329	64.4268	0	0	40.5285	21.1129
K03581	209.263	0	0	137.981	86.9761	225.494	0	0	141.85	73.895
K03584	151.426	655.345	0	202.7	189.15	161.067	697.447	0	202.642	158.346
K03585	29.8227	0	0	18.5281	12.2428	32.2134	0	0	20.2642	10.5564
K03587	152.959	128.011	0	122.253	91.1944	161.067	139.489	0	121.585	73.895
K03588	56.7286	0	0	36.681	23.0361	64.4268	0	0	40.5285	21.1129
K03589	155.873	531.583	0	183.281	169.591	161.067	557.958	0	182.378	137.234
K03590	0	531.678	0	77.9434	99.6004	0	557.958	0	81.057	84.4514
K03592	249.335	539.302	354.373	309.62	349.004	257.707	557.958	359.195	324.228	295.58
K03593	213.146	680.023	437.889	329.431	389.621	225.494	697.447	448.994	344.492	337.806
K03594	184.064	0	0	105.919	66.9323	161.067	0	0	101.321	52.7821
K03595	149.372	134.315	0	123.307	90.5748	161.067	139.489	0	121.585	73.895
K03596	156.933	515.734	0	195.829	165.335	161.067	697.447	0	202.642	158.346
K03597	30.4573	0	0	18.8268	13.2758	32.2134	0	0	20.2642	10.5564
K03601	124.392	394.259	0	139.722	125.895	128.854	418.468	0	141.85	105.564
K03602	119.947	246.216	0	113.939	93.751	128.854	278.979	0	121.585	84.4514
K03605	61.0124	0	0	37.4566	23.7521	64.4268	0	0	40.5285	21.1129
K03606	64.8567	0	0	39.5308	24.1027	64.4268	0	0	40.5285	21.1129
K03608	150.16	0	0	98.1553	62.4539	161.067	0	0	101.321	52.7821
K03609	152.767	0	0	96.2942	60.4291	161.067	0	0	101.321	52.7821
K03610	145.815	0	0	89.209	56.138	161.067	0	0	101.321	52.7821
K03611	0	519.018	0	76.729	100.1	0	557.958	0	81.057	84.4514
K03621	148.718	658.828	0	188.826	181.36	161.067	697.447	0	202.642	158.346
K03622	0	0	1503.17	348.003	629.27	0	0	1616.38	364.756	570.047
K03624	0	638.999	0	99.7696	123.626	0	697.447	0	101.321	105.564
K03625	149.695	0	0	90.5736	57.7866	161.067	0	0	101.321	52.7821
K03626	0	0	442.242	95.5401	186.389	0	0	448.994	101.321	158.346
K03628	0	669.276	0	91.5187	118.596	0	697.447	0	101.321	105.564
K03629	153.688	264.062	0	132.895	108.595	161.067	278.979	0	141.85	95.0079
K03630	150.556	0	0	95.5444	65.1797	161.067	0	0	101.321	52.7821
K03631	151.454	131.317	0	115.424	84.0199	161.067	139.489	0	121.585	73.895
K03635	153.915	509.495	0	182.664	168.594	161.067	557.958	0	182.378	137.234
K03636	288.418	0	510.819	295.643	338.831	322.134	139.489	538.793	344.492	316.693
K03637	158.768	553.686	0	169.58	158.952	161.067	557.958	0	182.378	137.234
K03638	188.286	517.864	0	203.209	177.088	193.28	557.958	0	202.642	147.79
K03639	152.945	530.805	0	182.574	167.364	161.067	557.958	0	182.378	137.234
K03640	0	648.335	0	95.2383	127.883	0	697.447	0	101.321	105.564
K03641	58.5057	656.83	0	139.994	137.099	32.2134	697.447	0	121.585	116.121
K03642	250.08	0	0	156.599	101.949	257.707	0	0	162.114	84.4514
K03643	0	122.094	0	17.2652	23.3087	0	139.489	0	20.2642	21.1129
K03644	317.133	656.308	0	297.213	246.059	322.134	697.447	0	303.964	211.129
K03648	31.2476	139.329	0	35.9883	34.0576	32.2134	139.489	0	40.5285	31.6693
K03650	157.817	663.645	0	198.218	187.924	161.067	697.447	0	202.642	158.346
K03651	243.733	0	428.773	259.068	296.755	257.707	0	448.994	263.435	242.798
K03652	31.3234	0	429.126	123.715	204.102	32.2134	0	448.994	121.585	168.903
K03654	155.066	0	0	96.1868	61.1399	161.067	0	0	101.321	52.7821
K03655	157.425	665.06	0	195.159	186.603	161.067	697.447	0	202.642	158.346
K03657	156.341	662.424	0	202.213	190.449	161.067	697.447	0	202.642	158.346
K03660	0	0	437.832	98.1815	158.541	0	0	448.994	101.321	158.346
K03664	154.935	653.509	0	189.244	183.031	161.067	697.447	0	202.642	158.346
K03665	184.511	0	437.583	213.293	252.404	193.28	0	448.994	222.907	221.685
K03666	137.022	0	0	94.0317	61.7407	161.067	0	0	101.321	52.7821
K03667	0	824.013	0	114.688	126.096	0	697.447	0	101.321	105.564
K03668	62.6388	0	0	43.3739	27.587	32.2134	0	0	20.2642	10.5564
K03671	772.16	1039.8	1318.57	949.714	1076.09	837.548	1115.92	1346.98	992.948	918.409
K03672	124.838	0	0	82.6538	54.2445	128.854	0	0	81.057	42.2257
K03676	346.23	118.365	0	252.078	169.977	386.561	139.489	0	263.435	147.79
K03679	0	0	425.575	97.1639	175.741	0	0	448.994	101.321	158.346
K03684	85.142	136.063	0	70.8851	54.9662	96.6401	139.489	0	81.057	52.7821
K03685	273.745	525.879	0	257.873	214.756	289.92	557.958	0	263.435	179.459
K03686	157.862	655.031	430.579	291.878	366.365	161.067	697.447	448.994	303.964	316.693
K03687	259.924	717.88	447.116	359.645	402.63	289.92	697.447	448.994	385.021	358.919
K03688	711.749	538.154	0	540.985	398.837	740.908	557.958	0	547.135	327.249
K03689	23.2633	0	0	19.0146	11.5218	32.2134	0	0	20.2642	10.5564
K03692	61.8056	0	0	39.2318	24.3021	64.4268	0	0	40.5285	21.1129
K03694	0	129.067	0	21.0053	26.0719	0	139.489	0	20.2642	21.1129
K03695	305.786	137.895	0	219.855	150.93	322.134	139.489	0	222.907	126.677
K03696	275.72	0	0	196.204	123.797	322.134	0	0	202.642	105.564
K03699	379.01	268.643	617.741	431.014	472.254	386.561	278.979	628.592	425.549	390.588
K03701	153.41	647.791	438.887	294.427	374.81	161.067	697.447	448.994	303.964	316.693
K03702	146.15	669.256	438.246	290.524	365.825	161.067	697.447	448.994	303.964	316.693
K03703	158.724	792.865	434.842	308.814	394.34	161.067	836.937	448.994	324.228	337.806
K03704	30.2169	931.084	377.111	253.309	349.602	32.2134	976.426	448.994	263.435	316.693
K03705	156.793	132.592	0	124.68	91.3884	161.067	139.489	0	121.585	73.895
K03707	89.0764	0	0	55.2505	34.4462	96.6401	0	0	60.7927	31.6693
K03709	0	0	435.251	94.9644	178.142	0	0	448.994	101.321	158.346
K03711	291.672	382.655	177.591	292.656	276.785	322.134	418.468	179.598	303.964	232.241
K03716	31.1854	0	0	19.2065	11.3058	32.2134	0	0	20.2642	10.5564
K03718	0	0	262.007	41.3387	73.7995	0	0	269.397	60.7927	95.0079
K03719	0	138.154	0	16.6454	22.3937	0	139.489	0	20.2642	21.1129
K03723	152.309	130.971	0	117.854	87.4749	161.067	139.489	0	121.585	73.895
K03724	91.3294	0	435.903	160.654	233.19	96.6401	0	448.994	162.114	190.016
K03726	28.8088	0	351.037	92.5862	157.003	32.2134	0	359.195	101.321	137.234
K03727	91.499	0	0	58.7549	37.1612	96.6401	0	0	60.7927	31.6693
K03737	121.967	0	0	80.3558	50.9247	128.854	0	0	81.057	42.2257
K03741	120.182	131.752	420.75	192.652	260.112	96.6401	139.489	448.994	182.378	211.129
K03742	149.071	0	0	94.3259	61.0073	161.067	0	0	101.321	52.7821
K03743	149.071	512.267	0	165.256	153.323	161.067	557.958	0	182.378	137.234
K03744	120.65	0	0	77.8301	54.2232	128.854	0	0	81.057	42.2257
K03745	0	270.374	0	40.9964	53.4334	0	278.979	0	40.5285	42.2257
K03748	27.3502	0	0	16.3695	9.66	32.2134	0	0	20.2642	10.5564
K03750	151.198	527.312	0	174.62	161.558	161.067	557.958	0	182.378	137.234
K03752	151.768	532.825	0	161.337	143.189	161.067	557.958	0	182.378	137.234
K03753	0	137.879	0	17.5306	23.026	0	139.489	0	20.2642	21.1129
K03768	240.544	650.917	880.089	433.008	587.703	257.707	697.447	897.989	466.078	506.709
K03772	117.524	0	0	74.0667	50.4333	128.854	0	0	81.057	42.2257
K03774	36.6909	0	0	19.0854	12.4692	32.2134	0	0	20.2642	10.5564
K03775	36.6909	0	0	19.0854	12.4692	32.2134	0	0	20.2642	10.5564
K03778	56.8624	0	0	35.3797	22.1567	64.4268	0	0	40.5285	21.1129
K03781	33.1706	0	0	22.4493	14.2358	32.2134	0	0	20.2642	10.5564
K03782	29.4908	269.003	0	58.4066	63.3559	32.2134	278.979	0	60.7927	52.7821
K03786	153.995	623.456	0	180.847	177.05	161.067	697.447	0	202.642	158.346
K03787	300.317	0	0	189.714	119.639	322.134	0	0	202.642	105.564
K03789	147.987	0	443.303	186.284	226.401	161.067	0	448.994	202.642	211.129
K03790	368.547	0	0	243.942	152.576	418.774	0	0	263.435	137.234
K03791	29.7385	0	0	20.6629	12.9263	32.2134	0	0	20.2642	10.5564
K03793	0	391.769	0	58.6729	75.6638	0	418.468	0	60.7927	63.3386
K03795	237.725	0	440.976	262.293	286.529	257.707	0	448.994	263.435	242.798
K03796	0	655.387	0	95.8618	121.672	0	697.447	0	101.321	105.564
K03797	621.806	667.479	0	491.847	370.691	644.268	697.447	0	506.606	316.693
K03798	612.123	537.238	0	485.055	371.236	773.121	697.447	0	587.663	358.919
K03799	270.058	0	84.0882	190.851	149.261	289.92	0	89.7989	202.642	126.677
K03801	150.051	400.219	0	135.51	138.058	161.067	418.468	0	162.114	116.121
K03802	153.92	0	0	99.4585	64.2494	161.067	0	0	101.321	52.7821
K03809	29.9553	0	0	19.2588	13.1295	32.2134	0	0	20.2642	10.5564
K03810	116.163	0	0	73.0453	45.1822	128.854	0	0	81.057	42.2257
K03811	65.4388	0	0	43.0324	28.0524	64.4268	0	0	40.5285	21.1129
K03813	29.269	0	0	20.8307	12.8433	32.2134	0	0	20.2642	10.5564
K03818	157.159	0	0	102.671	64.3911	161.067	0	0	101.321	52.7821
K03819	29.0343	0	0	18.6686	13.2384	32.2134	0	0	20.2642	10.5564
K03820	152.022	675.765	0	194.707	185.963	161.067	697.447	0	202.642	158.346
K03821	28.7116	0	620.366	155.737	270.04	32.2134	0	628.592	162.114	232.241
K03824	58.8203	0	0	36.5334	23.6562	64.4268	0	0	40.5285	21.1129
K03828	153.102	0	0	94.4212	60.8649	161.067	0	0	101.321	52.7821
K03829	30.748	393.756	0	79.729	90.9837	32.2134	418.468	0	81.057	73.895
K03830	148.117	0	0	92.8358	57.5919	161.067	0	0	101.321	52.7821
K03832	89.9422	0	0	55.5893	35.4238	96.6401	0	0	60.7927	31.6693
K03834	61.0295	0	0	39.7013	23.6344	64.4268	0	0	40.5285	21.1129
K03839	212.732	0	91.8994	153.824	123.202	225.494	0	89.7989	162.114	105.564
K03841	194.293	0	0	116.411	72.5997	193.28	0	0	121.585	63.3386
K03852	0	128.204	0	42.9761	74.589	0	418.468	0	60.7927	63.3386
K03856	246.404	0	0	161.014	103.482	257.707	0	0	162.114	84.4514
K03867	93.9929	0	0	55.4592	34.0218	96.6401	0	0	60.7927	31.6693
K03879	0	400.232	0	78.1931	99.4398	0	557.958	0	81.057	84.4514
K03880	0	132.157	0	18.5634	22.835	0	139.489	0	20.2642	21.1129
K03885	483.276	0	956.432	519.331	592.441	515.414	0	987.787	547.135	517.265
K03892	174.36	0	0	114.101	68.2894	225.494	0	0	141.85	73.895
K03924	335.143	131.505	173.18	270.772	234.156	354.347	139.489	179.598	283.699	200.572
K03925	0	734.83	0	93.0257	107.057	0	697.447	0	101.321	105.564
K03926	111.767	128.827	281.892	150.213	180.57	128.854	139.489	269.397	162.114	158.346
K03928	34.9477	0	0	18.1951	12.6284	32.2134	0	0	20.2642	10.5564
K03932	56.4737	0	0	34.8693	22.4734	64.4268	0	0	40.5285	21.1129
K03937	0	801.016	0	102.42	129.14	0	697.447	0	101.321	105.564
K03939	0	114.67	0	18.9392	26.8279	0	139.489	0	20.2642	21.1129
K03953	0	130.75	0	19.009	23.3179	0	139.489	0	20.2642	21.1129
K03969	305.195	0	0	195.487	125.571	322.134	0	0	202.642	105.564
K03972	33.55	0	0	22.1431	14.7711	32.2134	0	0	20.2642	10.5564
K03975	227.803	0	515.107	239.546	291.404	225.494	0	538.793	263.435	263.911
K03976	30.9865	0	0	19.6967	11.056	32.2134	0	0	20.2642	10.5564
K03977	147.843	0	0	91.8913	58.8945	161.067	0	0	101.321	52.7821
K03978	0	140.068	0	20.8991	26.1712	0	139.489	0	20.2642	21.1129
K03979	152.356	687.335	0	213.585	191.235	161.067	697.447	0	202.642	158.346
K03980	248.588	675.849	0	250.38	221.457	257.707	697.447	0	263.435	190.016
K04028	167.218	0	0	97.5465	62.0943	161.067	0	0	101.321	52.7821
K04033	30.4153	0	0	18.9734	13.2406	32.2134	0	0	20.2642	10.5564
K04034	57.9827	0	88.7115	54.7399	61.3406	64.4268	0	89.7989	60.7927	52.7821
K04035	311.386	0	0	195.643	127.852	322.134	0	0	202.642	105.564
K04037	149.753	0	0	98.5417	61.0316	161.067	0	0	101.321	52.7821
K04038	152.055	0	0	99.2035	61.1309	161.067	0	0	101.321	52.7821
K04039	155.353	0	0	95.5064	59.6842	161.067	0	0	101.321	52.7821
K04040	148.707	0	0	91.6023	57.8515	161.067	0	0	101.321	52.7821
K04042	155.148	276.605	0	141.695	116.618	161.067	278.979	0	141.85	95.0079
K04043	516.281	672.289	340.84	529.58	526.843	547.627	697.447	448.994	547.135	443.37
K04047	508.594	0	80.0924	329.4	235.542	515.414	0	89.7989	344.492	200.572
K04065	126.051	634.705	0	165.521	159.5	128.854	697.447	0	182.378	147.79
K04066	267.144	776.548	0	226.595	209.702	257.707	697.447	0	263.435	190.016
K04068	160.757	0	0	103.827	61.8539	161.067	0	0	101.321	52.7821
K04069	123.938	0	345.856	159.1	205.904	128.854	0	359.195	162.114	168.903
K04072	121.51	0	0	82.0457	52.0194	128.854	0	0	81.057	42.2257
K04075	153.743	654.811	0	191.509	183.541	161.067	697.447	0	202.642	158.346
K04077	368.271	934.259	0	365.078	277.809	386.561	697.447	0	344.492	232.241
K04078	237.451	674.082	0	262.07	224.108	225.494	697.447	0	243.171	179.459
K04079	154.706	134.698	0	116.914	85.6847	161.067	139.489	0	121.585	73.895
K04080	0	132.528	0	20.4523	24.636	0	139.489	0	20.2642	21.1129
K04083	152.814	0	0	94.409	58.8195	161.067	0	0	101.321	52.7821
K04085	32.7548	121.74	404.409	128.983	216.897	32.2134	139.489	448.994	141.85	190.016
K04087	0	656.699	0	103.451	131.622	0	697.447	0	101.321	105.564
K04088	0	676.728	0	90.899	120.58	0	697.447	0	101.321	105.564
K04091	124.649	0	0	79.5687	52.4418	128.854	0	0	81.057	42.2257
K04094	124.766	0	0	81.6641	51.4329	128.854	0	0	81.057	42.2257
K04095	62.87	0	168.245	79.2742	100.987	64.4268	0	179.598	81.057	84.4514
K04096	180.883	124.656	0	133.264	100.858	193.28	139.489	0	141.85	84.4514
K04103	32.9778	0	0	20.0169	12.3377	32.2134	0	0	20.2642	10.5564
K04127	66.0491	0	0	40.4825	25.6494	64.4268	0	0	40.5285	21.1129
K04479	0	0	438.673	95.9749	185.71	0	0	448.994	101.321	158.346
K04483	0	0	248.449	56.8998	112.967	0	0	359.195	81.057	126.677
K04485	187.479	0	0	120.193	73.2098	161.067	0	0	101.321	52.7821
K04487	393.902	128.565	433.578	361.954	360.121	418.774	139.489	448.994	385.021	316.693
K04488	56.9546	388.018	167.234	113.5	174.511	64.4268	418.468	179.598	141.85	147.79
K04517	153.509	256.226	0	134.051	112.785	161.067	278.979	0	141.85	95.0079
K04518	121.376	0	446.316	177.502	239.593	128.854	0	448.994	182.378	200.572
K04561	158.792	0	0	96.8196	74.4077	96.6401	0	0	60.7927	31.6693
K04564	297.553	272.619	945.026	459.557	620.174	322.134	278.979	987.787	466.078	496.152
K04565	22.9519	0	0	14.167	8.67251	32.2134	0	0	20.2642	10.5564
K04566	31.9198	669.387	445.692	213.75	320.037	32.2134	697.447	448.994	222.907	274.467
K04567	125.096	0	0	72.4451	45.5473	128.854	0	0	81.057	42.2257
K04643	0	532.622	0	94.1351	118.616	0	697.447	0	101.321	105.564
K04651	246.919	0	0	163.34	106.727	257.707	0	0	162.114	84.4514
K04652	210.905	0	0	135.718	86.0863	225.494	0	0	141.85	73.895
K04653	112.38	0	0	66.3976	40.917	128.854	0	0	81.057	42.2257
K04654	122.045	0	0	78.4497	49.3451	128.854	0	0	81.057	42.2257
K04655	156.816	0	0	94.4256	58.8583	161.067	0	0	101.321	52.7821
K04656	123.287	0	0	80.7454	51.5369	128.854	0	0	81.057	42.2257
K04708	30.6084	0	0	19.3495	11.349	32.2134	0	0	20.2642	10.5564
K04718	31.3074	0	0	21.4798	13.7302	32.2134	0	0	20.2642	10.5564
K04719	0	0	432.861	96.1475	183.417	0	0	448.994	101.321	158.346
K04720	154.627	0	347.134	176.308	216.364	161.067	0	359.195	182.378	179.459
K04744	0	671.809	0	105.146	131.38	0	697.447	0	101.321	105.564
K04748	92.9085	0	613.566	195.832	291.407	96.6401	0	628.592	202.642	253.354
K04749	746.124	387.859	0	550.159	394.523	837.548	418.468	0	587.663	337.806
K04750	150.373	0	91.4982	115.376	99.9713	161.067	0	89.7989	121.585	84.4514
K04751	221.142	382.708	78.9048	218.983	200.194	225.494	418.468	89.7989	222.907	168.903
K04754	0	654.373	0	100.373	129.179	0	697.447	0	101.321	105.564
K04755	0	649.925	0	92.8653	120.166	0	697.447	0	101.321	105.564
K04757	389.533	512.079	0	334.633	268.225	418.774	557.958	0	344.492	221.685
K04758	169.811	0	0	129.558	87.76	193.28	0	0	121.585	63.3386
K04759	286.159	0	0	160.912	122.384	257.707	0	0	162.114	84.4514
K04763	303.544	265.226	0	229.928	168.704	322.134	278.979	0	243.171	147.79
K04771	586.331	665.625	0	473.515	363.7	612.054	697.447	0	486.342	306.136
K04773	294.586	650.687	0	294.378	249.307	322.134	697.447	0	303.964	211.129
K04774	0	137.033	0	19.3937	23.1744	0	139.489	0	20.2642	21.1129
K04781	32.1563	0	0	20.0942	13.5344	32.2134	0	0	20.2642	10.5564
K04782	27.2539	0	0	17.6802	11.4381	32.2134	0	0	20.2642	10.5564
K04786	124.496	0	0	78.6741	51.2955	128.854	0	0	81.057	42.2257
K04794	0	0	426.956	93.0758	182.317	0	0	448.994	101.321	158.346
K04795	0	0	268.604	49.1743	110.342	0	0	269.397	60.7927	95.0079
K04796	0	0	767.558	172.623	308.027	0	0	897.989	202.642	316.693
K04797	0	0	420.518	93.8201	180.37	0	0	448.994	101.321	158.346
K04798	0	0	408.544	99.0252	189.707	0	0	448.994	101.321	158.346
K04799	0	0	442.377	97.5852	181.329	0	0	448.994	101.321	158.346
K04800	0	0	349.13	92.7526	178.809	0	0	448.994	101.321	158.346
K04801	0	0	427.233	99.3729	182.427	0	0	448.994	101.321	158.346
K04802	0	0	425.763	99.6739	191.166	0	0	448.994	101.321	158.346
K05236	31.5812	0	0	19.8668	12.929	32.2134	0	0	20.2642	10.5564
K05275	402.919	0	0	257.179	160.796	418.774	0	0	263.435	137.234
K05303	61.1195	0	90.5074	59.4266	65.0201	64.4268	0	89.7989	60.7927	52.7821
K05337	197.278	0	434.608	223.172	270.376	193.28	0	448.994	222.907	221.685
K05341	61.317	0	0	40.4664	25.6815	64.4268	0	0	40.5285	21.1129
K05343	90.8387	0	0	65.5682	41.2031	96.6401	0	0	60.7927	31.6693
K05350	63.4625	0	0	38.9778	24.9147	64.4268	0	0	40.5285	21.1129
K05356	147.928	0	0	96.7858	60.7986	161.067	0	0	101.321	52.7821
K05366	455.529	525.73	0	360.11	266.914	483.201	557.958	0	385.021	242.798
K05367	62.7751	0	0	41.9157	26.1203	64.4268	0	0	40.5285	21.1129
K05369	62.2269	0	0	39.1803	25.0467	64.4268	0	0	40.5285	21.1129
K05370	58.3548	0	0	35.0729	23.292	64.4268	0	0	40.5285	21.1129
K05371	165.81	0	0	112.968	71.8688	193.28	0	0	121.585	63.3386
K05375	30.0411	0	0	16.5356	10.9145	32.2134	0	0	20.2642	10.5564
K05376	87.0841	0	0	49.5507	33.2565	96.6401	0	0	60.7927	31.6693
K05377	62.8088	0	0	35.5885	25.5251	64.4268	0	0	40.5285	21.1129
K05378	65.5148	0	0	38.9136	28.4106	64.4268	0	0	40.5285	21.1129
K05379	29.1912	0	0	18.2741	12.6227	32.2134	0	0	20.2642	10.5564
K05380	32.1948	0	0	20.5092	14.426	32.2134	0	0	20.2642	10.5564
K05381	93.0722	0	0	60.3768	45.7715	96.6401	0	0	60.7927	31.6693
K05382	311.843	0	0	197.391	130.461	322.134	0	0	202.642	105.564
K05383	203.502	0	0	140.789	88.8481	225.494	0	0	141.85	73.895
K05384	83.4248	0	0	55.9294	38.5688	128.854	0	0	81.057	42.2257
K05385	56.892	0	0	35.9151	19.1554	64.4268	0	0	40.5285	21.1129
K05386	87.842	0	0	58.9471	34.7707	128.854	0	0	81.057	42.2257
K05515	185.693	667.92	0	222.436	207.84	193.28	697.447	0	222.907	168.903
K05516	364.661	0	0	229.695	149.431	386.561	0	0	243.171	126.677
K05518	29.8273	0	0	18.7147	12.1945	32.2134	0	0	20.2642	10.5564
K05520	276.394	0	0	186.214	116.515	289.92	0	0	182.378	95.0079
K05521	149.497	0	0	99.4588	63.7082	161.067	0	0	101.321	52.7821
K05522	32.6862	0	0	20.8831	13.498	32.2134	0	0	20.2642	10.5564
K05524	0	622.239	0	89.9168	112.618	0	697.447	0	101.321	105.564
K05527	29.1838	262.62	0	57.9704	61.4288	32.2134	278.979	0	60.7927	52.7821
K05539	113.393	546.524	0	149.264	146.701	128.854	557.958	0	162.114	126.677
K05540	146.398	0	350.066	192.194	249.65	161.067	0	448.994	202.642	211.129
K05566	129.217	256.298	0	121.221	102.077	128.854	278.979	0	121.585	84.4514
K05568	0	131.72	0	21.9422	27.5537	0	139.489	0	20.2642	21.1129
K05570	0	133.274	0	16.9528	23.4477	0	139.489	0	20.2642	21.1129
K05572	157.52	0	0	98.0652	64.8776	161.067	0	0	101.321	52.7821
K05573	152.922	0	0	100.871	64.6157	161.067	0	0	101.321	52.7821
K05574	148.877	0	0	106.308	70.973	161.067	0	0	101.321	52.7821
K05575	680.631	0	0	441.13	278.927	708.694	0	0	445.813	232.241
K05576	147.823	0	0	94.0792	61.0321	161.067	0	0	101.321	52.7821
K05577	183.557	0	0	120.699	78.4273	193.28	0	0	121.585	63.3386
K05578	151.231	0	0	94.29	61.4159	161.067	0	0	101.321	52.7821
K05579	144.817	0	0	96.9405	61.4179	161.067	0	0	101.321	52.7821
K05580	121.163	0	0	75.5404	49.1974	128.854	0	0	81.057	42.2257
K05581	152.275	0	0	101.382	65.1864	161.067	0	0	101.321	52.7821
K05582	182.27	0	0	108.554	67.8095	193.28	0	0	121.585	63.3386
K05583	88.0801	0	0	59.9749	21.7648	161.067	0	0	101.321	52.7821
K05584	151.232	0	0	100.524	65.3334	161.067	0	0	101.321	52.7821
K05585	148.84	0	0	99.6899	65.0111	161.067	0	0	101.321	52.7821
K05586	93.337	0	0	60.2982	42.7663	96.6401	0	0	60.7927	31.6693
K05587	93.5458	0	0	60.3339	36.5199	96.6401	0	0	60.7927	31.6693
K05588	89.1905	0	0	62.1328	38.6278	96.6401	0	0	60.7927	31.6693
K05592	152.724	0	0	96.9717	63.9666	161.067	0	0	101.321	52.7821
K05595	85.6458	273.348	0	96.6096	88.0147	96.6401	278.979	0	101.321	73.895
K05601	62.2408	0	0	44.7536	29.4372	64.4268	0	0	40.5285	21.1129
K05606	0	0	429.469	89.1424	171.617	0	0	448.994	101.321	158.346
K05710	0	0	596.326	134.398	259.538	0	0	628.592	141.85	221.685
K05770	189.465	500.455	0	198.408	171.972	193.28	557.958	0	202.642	147.79
K05772	0	131.692	0	18.3864	22.7221	0	139.489	0	20.2642	21.1129
K05773	0	132.385	0	18.1519	21.2687	0	139.489	0	20.2642	21.1129
K05786	0	385.694	0	58.4707	76.8666	0	418.468	0	60.7927	63.3386
K05795	123.302	0	0	79.117	51.382	128.854	0	0	81.057	42.2257
K05800	0	138.154	0	16.6454	22.3937	0	139.489	0	20.2642	21.1129
K05801	0	132.6	0	20.7051	25.6356	0	139.489	0	20.2642	21.1129
K05803	28.5855	0	0	18.2379	12.2212	32.2134	0	0	20.2642	10.5564
K05807	0	645.177	0	89.853	113.304	0	697.447	0	101.321	105.564
K05808	158.293	0	0	105.325	69.0835	161.067	0	0	101.321	52.7821
K05810	151.762	692.502	0	196.098	190.392	161.067	697.447	0	202.642	158.346
K05813	0	130.545	0	19.2659	25.2531	0	139.489	0	20.2642	21.1129
K05815	0	139.539	0	18.0222	23.3628	0	139.489	0	20.2642	21.1129
K05816	0	124.706	0	19.4923	24.9413	0	139.489	0	20.2642	21.1129
K05817	28.0998	0	0	19.49	12.5646	32.2134	0	0	20.2642	10.5564
K05823	60.2441	0	0	39.4757	26.9645	64.4268	0	0	40.5285	21.1129
K05825	31.3349	0	0	20.1273	13.4893	32.2134	0	0	20.2642	10.5564
K05826	0	0	842.64	176.069	337.98	0	0	897.989	202.642	316.693
K05827	0	0	871.369	197	380.902	0	0	897.989	202.642	316.693
K05828	0	0	429.501	91.5032	167.27	0	0	448.994	101.321	158.346
K05829	0	0	436.371	97.9477	141.273	0	0	448.994	101.321	158.346
K05830	0	0	434.402	93.9671	178.612	0	0	448.994	101.321	158.346
K05831	0	0	436.963	97.0088	186.863	0	0	448.994	101.321	158.346
K05834	0	394.559	0	54.8859	73.1784	0	418.468	0	60.7927	63.3386
K05837	144.124	527.217	0	175.442	161.882	161.067	557.958	0	182.378	137.234
K05838	59.7445	134.473	0	55.1773	48.8155	64.4268	139.489	0	60.7927	42.2257
K05841	62.5214	0	0	39.6553	27.3907	64.4268	0	0	40.5285	21.1129
K05844	61.6758	0	0	44.5823	26.9586	64.4268	0	0	40.5285	21.1129
K05845	114.256	0	0	72.2428	46.5206	128.854	0	0	81.057	42.2257
K05846	149.771	133.055	0	116.042	84.2513	161.067	139.489	0	121.585	73.895
K05847	126.141	0	0	81.2999	51.0107	128.854	0	0	81.057	42.2257
K05878	58.4766	131.853	0	54.391	46.8955	64.4268	139.489	0	60.7927	42.2257
K05879	62.308	133.794	0	62.4409	55.0816	64.4268	139.489	0	60.7927	42.2257
K05881	62.9386	0	0	37.8945	24.7533	64.4268	0	0	40.5285	21.1129
K05895	158.121	0	0	104.881	70.0522	161.067	0	0	101.321	52.7821
K05896	156.966	655.412	404.549	303.727	391.261	161.067	697.447	448.994	303.964	316.693
K05901	30.4738	0	0	18.8356	11.7446	32.2134	0	0	20.2642	10.5564
K05913	33.9491	0	0	21.6029	14.9714	32.2134	0	0	20.2642	10.5564
K05916	30.0767	0	0	20.784	12.3122	32.2134	0	0	20.2642	10.5564
K05928	153.212	0	0	100.197	63.6546	161.067	0	0	101.321	52.7821
K05934	61.4049	0	332.228	144.152	213.271	64.4268	0	448.994	141.85	179.459
K05936	151.755	0	449.972	191.213	241.96	161.067	0	448.994	202.642	211.129
K05941	30.2867	0	0	19.5498	12.8635	32.2134	0	0	20.2642	10.5564
K05946	478.421	0	0	310.936	199.58	515.414	0	0	324.228	168.903
K05967	0	0	442.298	91.4917	182.036	0	0	448.994	101.321	158.346
K05978	60.8179	0	0	39.5461	25.1533	64.4268	0	0	40.5285	21.1129
K05979	296.165	0	0	182.999	115.52	257.707	0	0	162.114	84.4514
K05982	150.646	0	0	101.762	65.5794	161.067	0	0	101.321	52.7821
K05995	30.6444	0	0	19.6993	11.6875	32.2134	0	0	20.2642	10.5564
K06001	0	131.794	87.1381	37.9258	24.345	0	139.489	89.7989	40.5285	52.7821
K06006	273.256	0	0	172.995	110.984	289.92	0	0	182.378	95.0079
K06015	31.1998	0	0	19.8202	12.4393	32.2134	0	0	20.2642	10.5564
K06016	31.8505	0	0	18.0568	11.3065	32.2134	0	0	20.2642	10.5564
K06024	152.143	737.503	426.947	302.256	371.153	161.067	697.447	448.994	303.964	316.693
K06041	31.7766	662.935	0	112.251	128.137	32.2134	697.447	0	121.585	116.121
K06042	330.812	0	445.011	315.944	326.862	354.347	0	448.994	324.228	274.467
K06044	98.2166	0	0	61.4614	39.5966	96.6401	0	0	60.7927	31.6693
K06045	91.8672	0	0	57.9596	36.4211	96.6401	0	0	60.7927	31.6693
K06048	121.339	0	0	74.9187	48.1124	128.854	0	0	81.057	42.2257
K06075	0	0	87.6545	21.1005	40.0598	0	0	89.7989	20.2642	31.6693
K06077	0	134.878	0	13.6154	19.6397	0	139.489	0	20.2642	21.1129
K06118	161.894	0	88.0085	121.509	96.358	161.067	0	89.7989	121.585	84.4514
K06119	89.0174	0	0	54.7288	32.887	96.6401	0	0	60.7927	31.6693
K06123	61.399	0	0	38.3838	23.3627	64.4268	0	0	40.5285	21.1129
K06131	91.6321	0	0	57.6116	37.8045	96.6401	0	0	60.7927	31.6693
K06133	219.829	0	0	136.159	74.3623	225.494	0	0	141.85	73.895
K06134	0	642.467	0	91.9401	121.965	0	697.447	0	101.321	105.564
K06137	65.1922	130.476	423.821	155.642	236.304	64.4268	139.489	448.994	162.114	200.572
K06142	0	398.02	0	60.6274	77.2136	0	418.468	0	60.7927	63.3386
K06147	670.983	0	0	434.811	280.03	708.694	0	0	445.813	232.241
K06153	179.904	659.81	0	215.74	197.877	193.28	697.447	0	222.907	168.903
K06158	153.618	0	0	95.7674	61.4658	161.067	0	0	101.321	52.7821
K06160	62.0327	0	0	39.1072	23.521	64.4268	0	0	40.5285	21.1129
K06167	0	532.681	0	75.2961	97.1762	0	557.958	0	81.057	84.4514
K06168	155.083	672.22	0	197.957	187.367	161.067	697.447	0	202.642	158.346
K06169	124.253	0	0	79.3267	50.034	128.854	0	0	81.057	42.2257
K06173	156.729	274.442	0	131.962	109.328	161.067	278.979	0	141.85	95.0079
K06174	0	0	425.336	95.4954	190.354	0	0	448.994	101.321	158.346
K06176	0	0	453.96	101.781	196.864	0	0	448.994	101.321	158.346
K06177	59.4444	0	0	38.7253	24.5218	64.4268	0	0	40.5285	21.1129
K06178	146.545	136.853	0	112.059	81.9128	161.067	139.489	0	121.585	73.895
K06180	147.749	504.435	0	168.504	156.82	161.067	557.958	0	182.378	137.234
K06181	113.831	0	0	70.1063	44.9039	128.854	0	0	81.057	42.2257
K06187	146.158	700.627	0	195.185	182.698	161.067	697.447	0	202.642	158.346
K06188	63.6492	0	0	40.9639	26.6727	64.4268	0	0	40.5285	21.1129
K06190	0	664.796	0	97.703	118.945	0	697.447	0	101.321	105.564
K06194	240.613	0	0	156.324	99.1766	257.707	0	0	162.114	84.4514
K06195	0	137.667	0	19.2657	21.9936	0	139.489	0	20.2642	21.1129
K06196	186.684	656.495	451.286	327.125	391.477	193.28	697.447	538.793	344.492	358.919
K06197	271.329	0	0	169.898	108.569	289.92	0	0	182.378	95.0079
K06199	79.2126	256.106	555.181	221.926	318.522	96.6401	278.979	538.793	222.907	263.911
K06203	61.6335	0	0	42.0239	27.7745	64.4268	0	0	40.5285	21.1129
K06204	0	511.34	0	75.8251	96.0931	0	557.958	0	81.057	84.4514
K06206	143.844	667.701	0	189.386	183.795	161.067	697.447	0	202.642	158.346
K06207	156.783	661.84	0	190.977	179.754	161.067	697.447	0	202.642	158.346
K06208	163.485	0	0	107.874	58.546	193.28	0	0	121.585	63.3386
K06211	59.7269	0	0	38.3438	24.6377	64.4268	0	0	40.5285	21.1129
K06213	183.983	672.3	0	233.249	201.391	193.28	697.447	0	222.907	168.903
K06215	0	0	446.574	93.4173	183.41	0	0	448.994	101.321	158.346
K06217	141.374	658.956	0	192.776	188.248	161.067	697.447	0	202.642	158.346
K06218	308.318	0	83.3716	185.777	161.909	257.707	0	89.7989	182.378	116.121
K06223	308.241	0	430.902	283.426	301.826	322.134	0	448.994	303.964	263.911
K06287	151.171	659.203	0	187.677	177.77	161.067	697.447	0	202.642	158.346
K06320	90.3997	1060.42	0	213.424	233.687	96.6401	1115.92	0	222.907	200.572
K06324	28.8951	0	0	17.6194	10.8676	32.2134	0	0	20.2642	10.5564
K06346	150.096	0	0	93.705	60.9013	161.067	0	0	101.321	52.7821
K06373	59.2892	0	0	37.867	23.2668	64.4268	0	0	40.5285	21.1129
K06374	56.6909	0	0	38.6274	21.636	64.4268	0	0	40.5285	21.1129
K06381	371.432	0	0	235.409	147.185	386.561	0	0	243.171	126.677
K06384	91.2833	0	0	59.883	38.7264	96.6401	0	0	60.7927	31.6693
K06400	293.506	0	0	193.598	109.063	322.134	0	0	202.642	105.564
K06402	343.642	0	0	212.756	133.148	354.347	0	0	222.907	116.121
K06413	95.8139	130.885	0	78.2154	60.182	96.6401	139.489	0	81.057	52.7821
K06442	145.108	0	0	97.4928	60.9567	161.067	0	0	101.321	52.7821
K06443	29.1947	667.783	0	110.114	131.773	32.2134	697.447	0	121.585	116.121
K06445	32.8312	0	0	21.4527	13.3619	32.2134	0	0	20.2642	10.5564
K06518	26.1437	126.574	0	34.5519	35.9373	32.2134	139.489	0	40.5285	31.6693
K06607	57.8282	0	0	41.5263	26.872	64.4268	0	0	40.5285	21.1129
K06718	0	0	186.188	39.8496	75.8949	0	0	179.598	40.5285	63.3386
K06720	0	0	183.94	41.4117	79.934	0	0	179.598	40.5285	63.3386
K06861	146.805	126.578	0	119.085	90.3582	161.067	139.489	0	121.585	73.895
K06863	0	0	882.224	193.909	370.372	0	0	897.989	202.642	316.693
K06864	148.834	0	411.975	189.044	241.007	161.067	0	448.994	202.642	211.129
K06865	0	0	441.858	98.735	188.745	0	0	448.994	101.321	158.346
K06867	156.695	0	0	97.2961	60.4513	128.854	0	0	81.057	42.2257
K06869	0	0	1041.24	237.494	457.51	0	0	1077.59	243.171	380.031
K06871	126.806	0	0	74.1657	48.4268	128.854	0	0	81.057	42.2257
K06872	296.17	0	0	190.068	122.325	322.134	0	0	202.642	105.564
K06873	122.984	0	0	81.2058	50.9524	128.854	0	0	81.057	42.2257
K06875	0	0	415.58	100.066	181.241	0	0	448.994	101.321	158.346
K06876	127.76	657.965	0	181.345	175.259	128.854	697.447	0	182.378	147.79
K06877	94.4232	0	799.124	238.948	380.26	96.6401	0	808.19	243.171	316.693
K06878	32.8057	501.883	0	92.0177	105.885	32.2134	557.958	0	101.321	95.0079
K06880	62.5303	0	0	37.8326	24.8154	64.4268	0	0	40.5285	21.1129
K06883	421.333	0	0	282.348	177.559	450.987	0	0	283.699	147.79
K06884	49.0817	0	0	38.2502	26.6649	64.4268	0	0	40.5285	21.1129
K06885	32.5391	0	349.419	97.6841	165.014	32.2134	0	359.195	101.321	137.234
K06886	152.365	136.17	0	122.431	90.7296	161.067	139.489	0	121.585	73.895
K06888	151.132	0	447.222	190.417	244.222	161.067	0	448.994	202.642	211.129
K06889	297.468	137.233	0	217.013	151.695	322.134	139.489	0	222.907	126.677
K06890	0	651.979	0	90.2663	116.229	0	697.447	0	101.321	105.564
K06891	296.717	131.282	0	222.102	152.421	322.134	139.489	0	222.907	126.677
K06893	123.803	135.72	437.076	197.031	249.268	128.854	139.489	448.994	202.642	221.685
K06894	61.9804	0	0	40.0789	25.3221	64.4268	0	0	40.5285	21.1129
K06895	0	538.092	0	73.3048	94.917	0	557.958	0	81.057	84.4514
K06897	28.3807	0	0	16.8257	9.65263	32.2134	0	0	20.2642	10.5564
K06898	157.193	0	439.181	194.776	242.001	161.067	0	448.994	202.642	211.129
K06900	179.048	0	0	109.617	70.9743	193.28	0	0	121.585	63.3386
K06901	117.949	636.945	0	152.22	146.323	128.854	557.958	0	162.114	126.677
K06902	29.1372	266.83	0	60.1291	63.5997	32.2134	278.979	0	60.7927	52.7821
K06903	176.925	0	0	110.024	72.9128	193.28	0	0	121.585	63.3386
K06905	177.543	0	0	114.919	72.7671	193.28	0	0	121.585	63.3386
K06907	212.24	0	0	126.65	78.9703	225.494	0	0	141.85	73.895
K06909	0	130.599	0	22.0853	27.9496	0	139.489	0	20.2642	21.1129
K06911	150.747	825.717	82.5023	228.114	238.002	161.067	697.447	89.7989	222.907	190.016
K06915	216.912	0	436.396	241.795	280.825	225.494	0	448.994	243.171	232.241
K06917	31.369	126.515	0	41.3902	39.0913	32.2134	139.489	0	40.5285	31.6693
K06919	122.799	0	0	66.1967	38.9917	128.854	0	0	81.057	42.2257
K06920	152.66	0	436.399	179.209	227.401	161.067	0	448.994	202.642	211.129
K06921	30.5874	0	0	19.3953	12.9787	32.2134	0	0	20.2642	10.5564
K06922	29.4237	0	0	18.5253	11.7157	32.2134	0	0	20.2642	10.5564
K06923	142.833	128.761	0	114.815	86.2383	161.067	139.489	0	121.585	73.895
K06924	122.59	0	0	79.7926	50.5518	128.854	0	0	81.057	42.2257
K06925	153.594	661.996	0	186.018	184.774	161.067	697.447	0	202.642	158.346
K06926	177.802	0	0	117.273	75.9803	193.28	0	0	121.585	63.3386
K06927	0	0	429.724	84.3306	171.064	0	0	448.994	101.321	158.346
K06929	0	392.028	415.354	154.025	249.89	0	418.468	448.994	162.114	221.685
K06932	0	0	444.983	100.511	191.824	0	0	448.994	101.321	158.346
K06934	31.526	0	0	18.7247	12.0174	32.2134	0	0	20.2642	10.5564
K06937	0	0	519.787	115.389	187.593	0	0	448.994	101.321	158.346
K06938	0	503.694	0	67.7828	89.6682	0	557.958	0	81.057	84.4514
K06940	204.202	0	1045.83	360.979	519.595	225.494	0	1077.59	385.021	453.926
K06941	153.405	130.05	351.332	191.736	229.31	161.067	139.489	359.195	202.642	200.572
K06942	143.114	533.187	0	157.387	164.062	161.067	557.958	0	182.378	137.234
K06944	0	0	436.564	102.447	194.312	0	0	448.994	101.321	158.346
K06946	155.21	0	0	97.5518	62.5175	161.067	0	0	101.321	52.7821
K06949	267.039	0	0	170.85	104.91	257.707	0	0	162.114	84.4514
K06950	0	0	420.375	102.484	188.136	0	0	448.994	101.321	158.346
K06953	0	0	429.114	105.455	187.48	0	0	448.994	101.321	158.346
K06954	0	269.258	0	44.1566	74.7854	0	418.468	0	60.7927	63.3386
K06959	117.469	0	0	77.9407	49.4978	128.854	0	0	81.057	42.2257
K06960	159.867	0	0	90.9208	53.5816	161.067	0	0	101.321	52.7821
K06961	0	0	422.837	96.9546	190.147	0	0	448.994	101.321	158.346
K06962	152.591	0	0	105.083	68.7108	161.067	0	0	101.321	52.7821
K06963	0	0	430.234	90.8662	185.159	0	0	448.994	101.321	158.346
K06965	0	0	348.163	80.5862	146.695	0	0	359.195	81.057	126.677
K06971	144.621	0	0	91.5575	57.8826	161.067	0	0	101.321	52.7821
K06976	64.4992	0	0	44.8797	29.0048	64.4268	0	0	40.5285	21.1129
K06978	63.6642	0	0	38.5099	24.498	64.4268	0	0	40.5285	21.1129
K06979	27.7106	0	0	17.2245	11.5234	32.2134	0	0	20.2642	10.5564
K06980	148.062	0	0	94.7878	58.952	161.067	0	0	101.321	52.7821
K06981	25.8536	0	420.455	108.771	186.152	32.2134	0	448.994	121.585	168.903
K06982	0	0	449.631	96.5307	180.93	0	0	448.994	101.321	158.346
K06985	210.149	0	0	133.732	85.2666	225.494	0	0	141.85	73.895
K06987	148.819	0	0	93.889	59.534	161.067	0	0	101.321	52.7821
K06988	93.4146	0	0	58.7433	36.2225	128.854	0	0	81.057	42.2257
K06989	0	0	432.506	102.423	193.391	0	0	448.994	101.321	158.346
K06990	0	0	351.118	74.7326	148.608	0	0	359.195	81.057	126.677
K06991	115.862	393.944	0	132.523	114.572	128.854	418.468	0	141.85	105.564
K06995	58.3985	0	0	36.0912	23.48	64.4268	0	0	40.5285	21.1129
K06996	81.0604	0	464.879	144.6	215.078	64.4268	0	448.994	141.85	179.459
K06997	155.508	653.309	0	186.826	180.997	161.067	697.447	0	202.642	158.346
K06998	139.944	0	0	95.4422	59.8508	161.067	0	0	101.321	52.7821
K06999	170.376	667.592	0	221.334	203.783	193.28	697.447	0	222.907	168.903
K07000	93.699	0	0	64.3504	40.6296	96.6401	0	0	60.7927	31.6693
K07001	153.189	0	0	93.444	59.4596	161.067	0	0	101.321	52.7821
K07003	0	549.554	0	73.298	96.8249	0	557.958	0	81.057	84.4514
K07004	149.191	0	0	94.536	60.4412	161.067	0	0	101.321	52.7821
K07005	0	0	425.793	103.815	191.435	0	0	448.994	101.321	158.346
K07006	224.53	0	340.621	226.196	244.358	193.28	0	359.195	202.642	190.016
K07008	58.0705	0	0	38.3746	24.5596	64.4268	0	0	40.5285	21.1129
K07009	91.4507	0	0	56.485	33.9426	96.6401	0	0	60.7927	31.6693
K07010	61.0024	129.504	0	61.7127	53.0525	64.4268	139.489	0	60.7927	42.2257
K07012	151.984	0	0	100.003	63.7547	161.067	0	0	101.321	52.7821
K07013	271.723	0	0	177.05	112.946	289.92	0	0	182.378	95.0079
K07015	148.533	0	0	88.2657	59.0236	161.067	0	0	101.321	52.7821
K07018	0	654.273	0	100.206	124.348	0	697.447	0	101.321	105.564
K07023	33.0378	0	429.686	110.066	192.021	32.2134	0	448.994	121.585	168.903
K07024	183.65	0	0	119.082	77.7972	193.28	0	0	121.585	63.3386
K07025	202.636	0	0	130.001	81.3338	225.494	0	0	141.85	73.895
K07026	31.8067	129.956	0	42.5543	41.1246	32.2134	139.489	0	40.5285	31.6693
K07027	117.142	0	93.6505	92.3063	88.1762	161.067	0	89.7989	121.585	84.4514
K07028	140.641	0	0	92.4285	58.1567	161.067	0	0	101.321	52.7821
K07029	307.592	0	0	211.588	137.473	322.134	0	0	202.642	105.564
K07031	0	0	261.054	56.9599	110.208	0	0	269.397	60.7927	95.0079
K07032	27.1365	0	0	18.992	11.6197	32.2134	0	0	20.2642	10.5564
K07037	185.038	0	0	115.983	75.2443	193.28	0	0	121.585	63.3386
K07038	391.56	0	0	257.285	163.785	418.774	0	0	263.435	137.234
K07040	159.336	0	0	97.1297	60.4217	161.067	0	0	101.321	52.7821
K07041	0	0	428.976	95.867	184.5	0	0	448.994	101.321	158.346
K07042	159.518	641.436	0	196.483	195.119	161.067	697.447	0	202.642	158.346
K07045	0	0	342.889	80.5772	157.501	0	0	359.195	81.057	126.677
K07050	0	124.361	440.453	119.346	215.483	0	139.489	448.994	121.585	179.459
K07051	58.8641	0	0	39.7641	24.754	64.4268	0	0	40.5285	21.1129
K07052	737.709	0	435.045	572.053	488.463	773.121	0	448.994	587.663	411.701
K07053	180.471	0	0	120.558	84.5431	193.28	0	0	121.585	63.3386
K07054	59.3662	0	0	38.8151	21.5131	64.4268	0	0	40.5285	21.1129
K07056	155.52	671.916	0	197.671	190.753	161.067	697.447	0	202.642	158.346
K07058	301.474	0	0	191.694	121.161	322.134	0	0	202.642	105.564
K07059	57.3201	0	0	36.0032	22.6935	64.4268	0	0	40.5285	21.1129
K07060	0	0	441.555	96.5985	179.633	0	0	448.994	101.321	158.346
K07062	87.9487	0	0	60.6406	38.2004	96.6401	0	0	60.7927	31.6693
K07063	348.397	0	0	215.926	155.328	386.561	0	0	243.171	126.677
K07064	114.127	0	0	78.3656	53.8636	128.854	0	0	81.057	42.2257
K07065	428.895	0	0	270.604	170.486	450.987	0	0	283.699	147.79
K07066	371.57	0	0	237.715	157.247	386.561	0	0	243.171	126.677
K07068	0	0	856.862	181.681	356.213	0	0	897.989	202.642	316.693
K07071	159.435	0	0	98.9023	60.3415	161.067	0	0	101.321	52.7821
K07074	122.619	0	0	77.3366	48.9506	128.854	0	0	81.057	42.2257
K07075	857.504	0	0	576.956	375.451	966.401	0	0	607.927	316.693
K07076	358.324	0	0	247.59	147.618	418.774	0	0	263.435	137.234
K07079	417.912	0	0	270.144	171.67	450.987	0	0	283.699	147.79
K07080	61.7968	396.171	0	101.284	99.0668	64.4268	418.468	0	101.321	84.4514
K07082	64.3426	0	0	40.484	25.6551	64.4268	0	0	40.5285	21.1129
K07086	220.435	0	435.541	239.239	278.089	225.494	0	448.994	243.171	232.241
K07089	216.832	0	0	136.833	86.6353	225.494	0	0	141.85	73.895
K07090	612.577	2883.17	596.261	970.002	1040.81	644.268	3068.77	718.391	1013.21	928.966
K07091	191.62	0	0	118.884	73.7215	193.28	0	0	121.585	63.3386
K07093	306.041	0	0	192.419	127.572	322.134	0	0	202.642	105.564
K07098	176.673	136.107	0	135.733	98.7569	193.28	139.489	0	141.85	84.4514
K07100	279.364	0	0	173.382	108.597	289.92	0	0	182.378	95.0079
K07101	148.789	135.991	0	114.195	83.2247	161.067	139.489	0	121.585	73.895
K07102	0	538.32	0	71.3469	90.2236	0	557.958	0	81.057	84.4514
K07106	152.305	0	0	98.8972	62.2324	161.067	0	0	101.321	52.7821
K07107	303.63	650.628	0	285.574	239.281	354.347	697.447	0	324.228	221.685
K07108	0	0	414.625	92.6924	187.67	0	0	448.994	101.321	158.346
K07112	24.1397	922.682	0	143.558	184.017	96.6401	976.426	0	202.642	179.459
K07113	0	505.612	0	71.1395	93.3791	0	557.958	0	81.057	84.4514
K07114	450.371	0	171.755	325.013	257.527	483.201	0	179.598	344.492	221.685
K07115	0	136.963	0	18.4294	23.7786	0	139.489	0	20.2642	21.1129
K07116	120.237	0	0	77.7339	50.0223	128.854	0	0	81.057	42.2257
K07118	58.2328	0	0	36.4003	23.5518	64.4268	0	0	40.5285	21.1129
K07119	30.9126	0	0	20.2452	12.688	32.2134	0	0	20.2642	10.5564
K07120	61.8221	528.937	0	117.151	124.273	64.4268	557.958	0	121.585	105.564
K07123	57.9104	0	0	35.256	22.9882	64.4268	0	0	40.5285	21.1129
K07124	371.822	0	415.86	333.202	332.959	386.561	0	448.994	344.492	285.024
K07127	25.8394	0	0	20.0448	13.5888	32.2134	0	0	20.2642	10.5564
K07130	58.2811	0	411.963	132.093	207.336	64.4268	0	448.994	141.85	179.459
K07131	34.3009	0	0	17.5825	9.85463	32.2134	0	0	20.2642	10.5564
K07136	31.322	132.539	0	36.4228	34.4898	64.4268	139.489	0	60.7927	42.2257
K07137	34.0472	0	0	23.0876	14.1922	32.2134	0	0	20.2642	10.5564
K07141	29.6237	128.071	0	39.7503	37.0777	32.2134	139.489	0	40.5285	31.6693
K07142	0	0	433.089	97.827	183.391	0	0	448.994	101.321	158.346
K07143	0	0	356.703	79.0993	152.378	0	0	448.994	101.321	158.346
K07146	120.031	650.969	0	174.069	173.274	128.854	697.447	0	182.378	147.79
K07147	153.592	408.771	0	156.807	141.138	161.067	418.468	0	162.114	116.121
K07149	0	643.411	0	104.11	125.522	0	697.447	0	101.321	105.564
K07150	29.0366	0	0	19.5604	13.0609	32.2134	0	0	20.2642	10.5564
K07151	0	0	443.188	92.1459	182.392	0	0	448.994	101.321	158.346
K07154	30.0801	0	0	19.56	9.84967	32.2134	0	0	20.2642	10.5564
K07157	115.494	640.983	0	179.082	162.794	161.067	697.447	0	202.642	158.346
K07158	0	0	435.621	97.3579	189.841	0	0	448.994	101.321	158.346
K07159	0	0	357.917	79.867	149.382	0	0	359.195	81.057	126.677
K07160	0	522.25	0	73.2711	93.1101	0	557.958	0	81.057	84.4514
K07167	33.9491	131.856	0	39.7283	40.3387	32.2134	139.489	0	40.5285	31.6693
K07168	86.4725	404.898	0	124.597	120.17	96.6401	418.468	0	121.585	95.0079
K07171	612.717	0	87.2594	426.465	283.896	708.694	0	89.7989	466.078	263.911
K07172	93.5239	0	0	56.0432	36.9413	96.6401	0	0	60.7927	31.6693
K07175	61.8078	0	0	38.9727	25.374	64.4268	0	0	40.5285	21.1129
K07176	25.9633	0	431.214	114.476	189.661	32.2134	0	448.994	121.585	168.903
K07178	0	0	427.017	94.5332	186.399	0	0	448.994	101.321	158.346
K07182	0	0	174.738	42.0778	83.6326	0	0	179.598	40.5285	63.3386
K07190	95.6109	0	0	64.468	42.2114	96.6401	0	0	60.7927	31.6693
K07192	277.39	0	0	182.098	115.843	289.92	0	0	182.378	95.0079
K07216	24.9383	0	0	18.9823	12.9405	32.2134	0	0	20.2642	10.5564
K07217	182.677	0	0	110.933	72.589	193.28	0	0	121.585	63.3386
K07220	93.2095	277.603	689.052	257.703	383.313	96.6401	278.979	718.391	263.435	327.249
K07222	65.0776	0	0	41.6329	24.8949	64.4268	0	0	40.5285	21.1129
K07226	65.6314	0	0	40.8661	27.8865	64.4268	0	0	40.5285	21.1129
K07231	27.9013	0	0	18.6196	10.7672	32.2134	0	0	20.2642	10.5564
K07232	61.1437	0	0	36.2943	23.7499	64.4268	0	0	40.5285	21.1129
K07233	32.4117	0	0	19.3731	11.2432	32.2134	0	0	20.2642	10.5564
K07238	121.804	0	86.1151	98.214	88.8709	128.854	0	89.7989	101.321	73.895
K07240	152.64	0	0	97.3912	62.3123	161.067	0	0	101.321	52.7821
K07242	109.881	0	0	76.0035	47.9947	128.854	0	0	81.057	42.2257
K07243	126.774	0	259.254	141.913	164.302	128.854	0	269.397	141.85	137.234
K07246	0	242.912	0	40.4085	50.7309	0	278.979	0	40.5285	42.2257
K07251	0	133.116	0	23.7584	27.8991	0	139.489	0	20.2642	21.1129
K07253	116.977	0	0	72.8474	33.0249	128.854	0	0	81.057	42.2257
K07254	0	0	440.311	97.6445	180.706	0	0	448.994	101.321	158.346
K07257	59.5782	133.455	440.558	152.394	227.119	64.4268	139.489	448.994	162.114	200.572
K07258	0	664.195	0	96.4826	124.853	0	697.447	0	101.321	105.564
K07259	679.087	0	0	431.205	271.634	547.627	0	0	344.492	179.459
K07260	286.253	0	0	176.08	111.506	289.92	0	0	182.378	95.0079
K07263	850.322	263.667	0	585.705	398.203	901.975	278.979	0	607.927	337.806
K07273	53.9673	0	0	36.466	22.8172	64.4268	0	0	40.5285	21.1129
K07276	0	750.351	0	94.587	127.395	0	697.447	0	101.321	105.564
K07277	220.93	537.18	0	217.046	188.344	225.494	557.958	0	222.907	158.346
K07282	32.2001	0	0	19.9181	12.3123	32.2134	0	0	20.2642	10.5564
K07300	125.491	0	0	72.7255	47.3619	128.854	0	0	81.057	42.2257
K07301	87.9349	266.002	630.621	235.591	347.975	96.6401	278.979	628.592	243.171	295.58
K07304	268.956	933.536	449.055	412.379	452.268	289.92	976.426	448.994	425.549	401.144
K07305	212.405	249.844	356.372	272.834	324.222	225.494	278.979	448.994	283.699	274.467
K07313	147.62	0	0	101.422	66.5251	161.067	0	0	101.321	52.7821
K07315	682.431	800.753	0	527.736	469.788	773.121	1115.92	0	648.456	422.257
K07316	60.7848	0	0	41.0876	24.7734	64.4268	0	0	40.5285	21.1129
K07317	249.019	0	0	158.893	103.976	257.707	0	0	162.114	84.4514
K07318	27.5499	0	0	16.416	9.91685	32.2134	0	0	20.2642	10.5564
K07319	146.278	0	0	98.6519	62.4417	161.067	0	0	101.321	52.7821
K07323	0	643.746	0	90.1404	116.913	0	697.447	0	101.321	105.564
K07325	0	0	858.11	196.661	364.546	0	0	897.989	202.642	316.693
K07330	0	0	167.15	37.2793	69.096	0	0	179.598	40.5285	63.3386
K07331	0	0	176.414	39.7143	77.5582	0	0	179.598	40.5285	63.3386
K07332	0	0	883.859	181.973	366.923	0	0	897.989	202.642	316.693
K07333	0	0	1133.87	258.556	485.019	0	0	1167.38	263.435	411.701
K07334	26.0975	0	0	16.377	11.539	64.4268	0	0	40.5285	21.1129
K07335	62.1662	141.249	0	59.1355	49.7178	64.4268	139.489	0	60.7927	42.2257
K07336	121.435	0	0	78.143	46.9269	128.854	0	0	81.057	42.2257
K07339	386.791	0	0	230.132	142.267	450.987	0	89.7989	303.964	179.459
K07340	129.544	0	0	81.4989	54.7048	128.854	0	0	81.057	42.2257
K07341	149.814	0	350.054	166.74	203.052	161.067	0	359.195	182.378	179.459
K07342	0	0	248.117	58.3563	103.14	0	0	448.994	101.321	158.346
K07343	28.4613	0	0	18.9083	11.8585	32.2134	0	0	20.2642	10.5564
K07358	23.8989	0	0	20.7548	14.0827	32.2134	0	0	20.2642	10.5564
K07389	127.764	0	0	73.5655	45.1777	128.854	0	0	81.057	42.2257
K07390	133.836	659.798	0	182.475	172.345	161.067	697.447	0	202.642	158.346
K07391	155.129	0	0	96.3744	59.2993	161.067	0	0	101.321	52.7821
K07393	169.103	129.981	0	129.345	93.7371	193.28	139.489	0	141.85	84.4514
K07395	92.1723	0	0	60.4992	41.0634	96.6401	0	0	60.7927	31.6693
K07396	31.8399	0	0	20.6962	13.9368	32.2134	0	0	20.2642	10.5564
K07397	31.1822	258.797	166.442	92.8666	132.159	32.2134	278.979	179.598	101.321	116.121
K07398	0	0	423.831	95.6684	182.332	0	0	448.994	101.321	158.346
K07399	152.52	0	0	102.703	61.6179	161.067	0	0	101.321	52.7821
K07402	62.4364	264.029	0	78.3446	71.8657	64.4268	278.979	0	81.057	63.3386
K07406	0	131.038	0	19.2095	26.3201	0	139.489	0	20.2642	21.1129
K07441	29.1748	0	0	15.4068	9.8339	32.2134	0	0	20.2642	10.5564
K07442	0	0	446.574	95.6505	183.278	0	0	448.994	101.321	158.346
K07443	33.9648	0	0	23.7031	13.9819	32.2134	0	0	20.2642	10.5564
K07444	147.992	0	0	97.9793	62.3124	161.067	0	0	101.321	52.7821
K07445	32.2866	0	0	20.0681	12.6227	32.2134	0	0	20.2642	10.5564
K07446	0	0	437.802	92.265	184.084	0	0	448.994	101.321	158.346
K07447	236.523	665.325	0	247.618	215.272	257.707	697.447	0	263.435	190.016
K07448	137.708	0	0	96.8013	60.8967	161.067	0	0	101.321	52.7821
K07450	383.584	0	0	300.449	157.672	418.774	0	0	263.435	137.234
K07451	1728.65	0	170.355	1059.19	740.496	1771.74	0	179.598	1155.06	643.942
K07452	63.2038	0	0	40.1419	25.6463	64.4268	0	0	40.5285	21.1129
K07454	60.3542	0	0	39.1695	25.62	64.4268	0	0	40.5285	21.1129
K07456	156.534	0	0	99.8149	63.1159	161.067	0	0	101.321	52.7821
K07458	0	0	179.843	38.8864	72.9325	0	0	269.397	60.7927	95.0079
K07459	27.2408	0	87.7072	35.9645	47.4527	32.2134	0	89.7989	40.5285	42.2257
K07460	147.996	0	0	91.0166	66.171	161.067	0	0	101.321	52.7821
K07461	27.7032	411.696	0	72.6155	81.5727	32.2134	557.958	0	101.321	95.0079
K07462	310.02	685.014	435.174	393.074	440.654	322.134	697.447	448.994	405.285	369.475
K07463	0	0	255.321	61.1731	114.027	0	0	269.397	60.7927	95.0079
K07464	111.371	0	0	71.5951	45.9851	128.854	0	0	81.057	42.2257
K07465	181.689	0	0	41.0973	40.8291	193.28	0	0	121.585	63.3386
K07466	0	0	91.2671	18.6282	35.6269	0	0	89.7989	20.2642	31.6693
K07474	30.9619	0	0	19.3069	13.0705	32.2134	0	0	20.2642	10.5564
K07477	0	0	428.406	102.999	184.846	0	0	448.994	101.321	158.346
K07478	62.067	0	0	39.2306	23.9737	64.4268	0	0	40.5285	21.1129
K07480	1244.78	0	0	772.259	518.099	998.615	0	0	628.192	327.249
K07481	1262	0	0	805.249	452.869	1159.68	0	0	729.513	380.031
K07482	293.433	0	0	161.425	114.809	322.134	0	0	202.642	105.564
K07483	205.096	0	0	124.641	62.562	257.707	0	0	162.114	84.4514
K07484	117.253	0	0	0	0	32.2134	0	0	20.2642	10.5564
K07485	1287.51	0	0	775.069	499.457	1417.39	0	0	891.627	464.483
K07486	395.084	0	80.9253	266.825	195.763	418.774	0	89.7989	283.699	168.903
K07487	487.112	0	0	311.735	262.778	547.627	0	0	344.492	179.459
K07491	983.822	0	0	619.566	401.686	998.615	0	0	628.192	327.249
K07492	1400.6	0	0	840.289	536.937	1224.11	0	0	770.041	401.144
K07493	360.753	0	0	235.705	131.55	354.347	0	0	222.907	116.121
K07494	2040.74	0	0	1667.52	976.988	2802.56	0	0	1762.99	918.409
K07495	1493.86	0	0	1085.76	706.179	1997.23	0	0	1256.38	654.499
K07496	4691.64	0	932.374	3098.27	2263.53	4252.17	0	808.19	2857.26	1678.47
K07497	946.637	0	89.7422	619.745	420.817	966.401	0	89.7989	628.192	348.362
K07498	87.9899	0	358.125	119.796	191.879	96.6401	0	359.195	141.85	158.346
K07499	700.76	0	0	371.758	269.572	773.121	0	0	486.342	253.354
K07504	86.8942	0	0	54.3874	33.9335	96.6401	0	0	60.7927	31.6693
K07506	306.299	0	0	197.47	130.486	322.134	0	0	202.642	105.564
K07507	199.22	0	82.8136	155.573	116.546	193.28	0	89.7989	141.85	95.0079
K07535	32.9694	0	0	19.1082	12.5427	32.2134	0	0	20.2642	10.5564
K07558	0	0	440.147	98.3833	191.774	0	0	448.994	101.321	158.346
K07559	96.6008	0	0	64.1222	40.6983	96.6401	0	0	60.7927	31.6693
K07560	112.527	0	0	74.6795	47.2415	128.854	0	0	81.057	42.2257
K07566	339	683.204	440.506	412.727	445.419	354.347	697.447	448.994	425.549	380.031
K07568	153.88	0	0	100.879	61.6066	161.067	0	0	101.321	52.7821
K07569	0	0	327.188	53.6091	143.456	0	0	359.195	81.057	126.677
K07572	0	0	420.514	91.7973	185.738	0	0	448.994	101.321	158.346
K07573	0	0	412.52	95.8853	187.143	0	0	448.994	101.321	158.346
K07577	0	0	885.791	188.744	360.13	0	0	897.989	202.642	316.693
K07581	0	0	439.142	99.5756	194.887	0	0	448.994	101.321	158.346
K07583	0	0	444.269	98.7862	190.853	0	0	448.994	101.321	158.346
K07588	0	0	438.707	92.8956	178.779	0	0	448.994	101.321	158.346
K07636	121.208	140.084	0	96.4751	71.0069	128.854	139.489	0	101.321	63.3386
K07638	0	528.94	0	79.5266	101.274	0	557.958	0	81.057	84.4514
K07646	124.368	0	0	80.8929	53.6972	128.854	0	0	81.057	42.2257
K07648	31.5466	0	0	19.636	12.3628	32.2134	0	0	20.2642	10.5564
K07657	58.5814	254.23	0	75.3037	67.9044	64.4268	278.979	0	81.057	63.3386
K07669	187.502	0	0	114.55	71.1208	193.28	0	0	121.585	63.3386
[truncated: 1,086 more rows]
